# Supplementary material for: Study of methane migration in the shallow subsurface from a gas pipe leak
Source: Oxford University Press journal article supplement (doi:10.1525/elementa.2021.00008), 2021-01-01
Supplement: metec_paper_ch4_experimental_data.xlsx [file metec_paper_ch4_experimental_data.xlsx]

## Sheet: Case #1 Homog-0.5
Location Coordinates (m from emission point)			Methane Concentration (%) at elapsed time since experiment start (hours)
X	Y	Z	CH4-T0.5	CH4-T4.0	CH4-T6.0
0	0	-0.914634	72.75	71.85	76.7
-0.25	0	-0.203252	8.9	70.2	68.15
-0.25	0	-0.609756	70.95	72.6	78.75
-0.25	0	-0.914634	70.45	70.1	74.75
-0.25	0	-1.21951	69.7	65.1	71.15
-0.75	0	-0.203252	1.35	58.85	59.25
-0.75	0	-0.609756	20.5	58.85	64.2
-0.75	0	-0.914634	34.5	57.25	62.65
-1.5	0	-0.203252	0	2.65	2.55
-1.5	0	-0.609756	0	10.55	14.85
-1.5	0	-0.914634	0	12	7.7
-2.25	0	-0.203252	0	0	0.2
-2.25	0	-0.609756	0	0.1	1.4
-2.25	0	-0.914634	0	0	1.3
0	0	-0.914634	72.75	71.85	76.7
0	0.5	-0.203252	2.55	65.55	70.65
0	0.5	-0.609756	68.55	65.35	77.45
0	0.5	-0.914634	69.1	75.25	83.05
0	0.5	-1.21951	69.55	71.7	71.15
0	0.75	-0.203252	9.15	60.45	51.8
0	0.75	-0.609756	25.6	58.2	65.2
0	0.75	-0.914634	40.45	62.2	69.5
0	1.25	-0.203252	1.05	22.2	22.25
0	1.25	-0.609756	0	19.6	23.95
0	1.25	-0.914634	0	14.75	18.3
0	2.75	-0.203252	0	0	0
0	2.75	-0.609756	0	0	0
0	2.75	-0.914634	0	0	0

## Sheet: Case #2 Homog-0.85
Location Coordinates (m from emission point)			Methane Concentration (%) at elapsed time (T) since experiment start (hours)
X	Y	Z	CH4-T0.75	CH4-T4.75	CH4-T6.75
0	0	-0.914634	75.95	67.55	69
-0.25	0	-0.203252	37.9	69.3	66.35
-0.25	0	-0.609756	76.65	67.9	71.85
-0.25	0	-0.914634	74.8	68.45	71.35
-0.25	0	-1.21951	75.8	63.7	69.8
-0.75	0	-0.203252	19.9	63.15	63.65
-0.75	0	-0.609756	55	72.5	64.55
-0.75	0	-0.914634	62.1	73.4	63.85
-1.5	0	-0.203252	0	8.55	6.4
-1.5	0	-0.609756	0	23.45	26.8
-1.5	0	-0.914634	0.55	17.65	21.7
-2.25	0	-0.203252	0	0.5	4.2
-2.25	0	-0.609756	0	0	4.25
-2.25	0	-0.914634	0	2.1	3.6
0	0	-0.914634	75.95	67.55	69
0	0.5	-0.203252	57.65	66.05	64.85
0	0.5	-0.609756	76.35	62.95	63.95
0	0.5	-0.914634	73.6	72.2	68.75
0	0.5	-1.21951	72.8	66.75	65.1
0	0.75	-0.203252	43.1	63.2	63.7
0	0.75	-0.609756	65.6	66	65.05
0	0.75	-0.914634	64.95	66.45	77.95
0	1.25	-0.203252	2.7	32.35	52.7
0	1.25	-0.609756	4.75	34.35	43.8
0	1.25	-0.914634	4.25	27.4	33.9
0	2.75	-0.203252	0	0	0
0	2.75	-0.609756	0	0	0.4
0	2.75	-0.914634	0	0	0.5

## Sheet: Case # 3 Layered-0.85
Location Coordinates (m from emission point)			Methane Concentration (%) at elapsed time (T) since experiment start (hours)
X	Y	Z	CH4-T0.75	CH4-T4.5	CH4-T6.0
-2.25	0	-0.203252	0	0	1.45
-2.25	0	-0.609756	0	0.5	1.45
-2.25	0	-0.914634	0	0.6	2.2
-1.5	0	-0.330285	0	11.75	18.15
-1.5	0	-0.609756	0	22.2	29
-1.5	0	-0.914634	0	17.4	24.55
-0.75	0	-0.203252	1.7	59.2	61.8
-0.75	0	-0.914634	72.35	52.95	66.65
-0.75	0	-0.609756	18.1	64.45	52.7
-0.25	0	-0.330285	52.55	65.2	71.3
-0.25	0	-0.609756	68.8	66.55	71.95
-0.25	0	-0.914634	68.1	53.15	56.95
-0.25	0	-1.21951	67.25	69	71.3
0	0	-0.914634	67.45	75.8	72.65
0	0.25	-0.330285	61.4	69.8	70.5
0	0.25	-0.609756	55.35	71.55	71.45
0	0.25	-0.914634	64.05	73.55	72.35
0	0.25	-1.21951	68.25	69.85	72.65
0	0.75	-0.330285	43.25	75	69.95
0	0.75	-0.609756	59.2	70.05	72.35
0	0.75	-0.914634	62.05	72.8	66.45
0	1.25	-0.330285	0	54.8	56.75
0	1.25	-0.609756	7.4	52.65	53.9
0	1.25	-0.914634	9.25	48.5	49.6
0	2.75	-0.330285	0	0	0.55
0	2.75	-0.609756	0	0	0.5
0	2.75	-0.914634	0	0	0.55
