# Supplementary material for: Study of methane migration in the shallow subsurface from a gas pipe leak
Source: Oxford University Press journal article supplement (doi:10.1525/elementa.2021.00008), 2021-01-01
Supplement: numerical_data_processing.xlsx [file numerical_data_processing.xlsx]

## Sheet: convec vs. diffu, t=6
x	y	advective flux, horizontal	diffusive flux, horizontal	advective flux, vertical	diffusive flux, vertical	kg/m^2/h	q=12.3lpm							x		convective flux, horizontal
-3	-0.8	2.79754e-06	3.66659e-05	5.48338e-06	-3.93574e-07									3		diffusive flux, horizontal
-2.95	-0.8	4.13438e-06	4.8018e-05	7.96445e-06	-1.46591e-07									2.95		convective flux, vertical
-2.9	-0.8	5.92476e-06	5.93714e-05	1.12158e-05	1.00417e-07									2.9		diffusive flux, vertical
-2.85	-0.8	8.2222e-06	7.07261e-05	1.52948e-05	3.47451e-07									2.85
-2.8	-0.8	1.12486e-05	0.000113799	2.05583e-05	-2.77396e-06									2.8
-2.75	-0.8	1.56788e-05	0.000132215	2.81486e-05	-2.60312e-06									2.75
-2.7	-0.8	2.20123e-05	0.000180606	3.88067e-05	-1.32159e-06									2.7
-2.65	-0.8	3.07415e-05	0.000229004	5.32177e-05	-3.99068e-08									2.65
-2.6	-0.8	4.31438e-05	0.000312821	7.32535e-05	-4.28698e-08									2.6
-2.55	-0.8	5.98021e-05	0.000388414	9.96786e-05	-5.67671e-07									2.55
-2.5	-0.8	7.91278e-05	0.000483195	0.000129735	-3.29105e-06									2.5
-2.45	-0.8	0.000107793	0.000594236	0.000173646	4.4113e-06									2.45
-2.4	-0.8	0.000146309	0.000766673	0.000231327	1.60281e-06									2.4
-2.35	-0.8	0.000197109	0.000924834	0.000306495	6.78979e-06									2.35
-2.3	-0.8	0.000261656	0.00108303	0.000400403	1.19777e-05									2.3
-2.25	-0.8	0.000344836	0.00138764	0.000519449	1.94318e-06									2.25
-2.2	-0.8	0.000449602	0.00161952	0.000667282	1.94505e-05									2.2
-2.15	-0.8	0.000588995	0.00193247	0.000862515	1.46364e-05									2.15
-2.1	-0.8	0.000765935	0.0022455	0.00110685	9.8214e-06									2.1
-2.05	-0.8	0.000995136	0.00265568	0.00141838	3.0883e-06									2.05
-2	-0.8	0.00127747	0.00301751	0.00179806	7.21617e-07									2
-1.95	-0.8	0.00162963	0.00351182	0.00226677	-3.72124e-06									1.95
-1.9	-0.8	0.00206791	0.00394046	0.00284436	9.06465e-07									1.9
-1.85	-0.8	0.00261087	0.00439149	0.00354561	-6.89346e-06									1.85
-1.8	-0.8	0.00328069	0.00485519	0.00439242	-2.27893e-05									1.8
-1.75	-0.8	0.00409032	0.0052788	0.00539947	-3.13133e-05									1.75
-1.7	-0.8	0.00507251	0.00565201	0.00658294	-3.01423e-05									1.7
-1.65	-0.8	0.00624304	0.00596793	0.00795951	-4.35426e-05									1.65
-1.6	-0.8	0.00763737	0.00621943	0.00954237	-5.80288e-05									1.6
-1.55	-0.8	0.00927164	0.0063467	0.0112964	-7.7158e-05									1.55
-1.5	-0.8	0.0111679	0.00636464	0.0132634	-6.46304e-05									1.5
-1.45	-0.8	0.0133498	0.00637173	0.0153974	-7.35018e-05									1.45
-1.4	-0.8	0.0158223	0.00612274	0.0176981	-8.5832e-05									1.4
-1.35	-0.8	0.0185878	0.00575582	0.0201044	-6.29384e-05									1.35
-1.3	-0.8	0.0216183	0.00524607	0.0225358	-8.72834e-05									1.3
-1.25	-0.8	0.0249019	0.00472781	0.0250117	-8.81996e-05									1.25
-1.2	-0.8	0.0284347	0.00415446	0.0274628	-9.1813e-05									1.2
-1.15	-0.8	0.0321806	0.00356874	0.029882	-0.000101098									1.15
-1.1	-0.8	0.0361147	0.00298205	0.0322543	-9.65542e-05									1.1
-1.05	-0.8	0.0402464	0.00239559	0.0345208	-7.61294e-05									1.05
-1	-0.8	0.0445736	0.00187944	0.0367875	-2.27236e-05									1
-0.95	-0.8	0.049057	0.00144204	0.0389462	-2.03403e-05									0.95
-0.9	-0.8	0.0538686	0.00105501	0.0411087	-1.55865e-05									0.9
-0.85	-0.8	0.0589302	0.000746342	0.0433424	-1.73966e-05									0.85
-0.8	-0.8	0.0644203	0.000524205	0.0456225	-1.75461e-05									0.8
-0.75	-0.8	0.070425	0.000335061	0.048052	-8.18489e-06									0.75
-0.7	-0.8	0.0770493	0.000203373	0.0508179	-1.20288e-06									0.7
-0.65	-0.8	0.0844216	0.000126203	0.053855	-2.36446e-06									0.65
-0.6	-0.8	0.0929423	7.2846e-05	0.0574231	7.79352e-07									0.6
-0.55	-0.8	0.102423	3.28943e-05	0.0616345	8.20483e-07									0.55
-0.5	-0.8	0.113705	1.9227e-05	0.0668165	-3.85078e-07									0.5
-0.45	-0.8	0.126908	8.07466e-06	0.0735841	-7.70169e-08									0.45
-0.4	-0.8	0.142588	3.37545e-06	0.0824806	4.77586e-08									0.4
-0.35	-0.8	0.161432	1.1729e-06	0.0946018	3.71262e-08									0.35
-0.3	-0.8	0.183946	3.51008e-07	0.112134	3.26725e-08									0.3
-0.25	-0.8	0.212475	7.68687e-08	0.138411	1.23019e-08									0.25
-0.2	-0.8	0.245464	1.77397e-08	0.179851	7.35983e-09									0.2
-0.15	-0.8	0.280961	2.1287e-09	0.248016	6.2537e-10									0.15
-0.1	-0.8	0.291388	3.55539e-09	0.367512	-1.25242e-09									0.1
-0.05	-0.8	0.223141	6.70691e-10	0.534602	-9.61558e-10									0.05
0	-0.8	0.00589553	4.27829e-10	0.632074	-1.5389e-09									0

## Sheet: convec&diffu, t=0.7,4,6
x	y	advective flux, t = 0.7h	diffusive flux, t = 0.7h	advective flux, t = 4h	diffusive flux, t = 4h	advective flux, t = 6h	diffusive flux, t = 6h		q=12.3lpm								x	convective flux, t = 0.7h
-3	-0.8	5.23226e-19	5.71463e-17	2.04239e-08	5.24973e-07	2.79754e-06	3.66659e-05										3	convective flux, t = 4.0h
-2.95	-0.8	1.2171e-18	6.01949e-17	4.30153e-08	9.51907e-07	4.13438e-06	4.8018e-05										2.95	convective flux, t = 6.0h
-2.9	-0.8	3.19815e-18	6.32439e-17	8.06014e-08	1.37889e-06	5.92476e-06	5.93714e-05										2.9	diffusive flux, t = 0.7h
-2.85	-0.8	5.44261e-18	6.62934e-17	1.35007e-07	1.80592e-06	8.2222e-06	7.07261e-05										2.85	diffusive flux, t = 4.0h
-2.8	-0.8	2.78519e-18	2.17214e-16	2.10038e-07	3.4639e-06	1.12486e-05	0.000113799										2.8	diffusive flux, t = 6.0h
-2.75	-0.8	1.67219e-17	4.22538e-16	3.02393e-07	3.92124e-06	1.56788e-05	0.000132215										2.75
-2.7	-0.8	2.99806e-17	2.54678e-16	5.45527e-07	8.67361e-06	2.20123e-05	0.000180606										2.7
-2.65	-0.8	3.79092e-17	8.67973e-17	9.91594e-07	1.34266e-05	3.07415e-05	0.000229004										2.65
-2.6	-0.8	5.27654e-17	1.67029e-15	1.76291e-06	2.15607e-05	4.31438e-05	0.000312821										2.6
-2.55	-0.8	1.77208e-17	1.77799e-15	2.95002e-06	3.11577e-05	5.98021e-05	0.000388414										2.55
-2.5	-0.8	1.54289e-16	5.86233e-16	4.104e-06	4.38688e-05	7.91278e-05	0.000483195										2.5
-2.45	-0.8	1.74212e-16	4.07162e-17	6.76428e-06	6.32182e-05	0.000107793	0.000594236										2.45
-2.4	-0.8	7.13166e-17	6.3107e-15	1.09493e-05	9.60651e-05	0.000146309	0.000766673										2.4
-2.35	-0.8	2.6311e-16	6.96088e-15	1.7256e-05	0.000130728	0.000197109	0.000924834										2.35
-2.3	-0.8	6.65354e-16	7.61122e-15	2.6037e-05	0.000165397	0.000261656	0.00108303										2.3
-2.25	-0.8	1.95198e-15	4.19088e-14	3.85686e-05	0.000260305	0.000344836	0.00138764										2.25
-2.2	-0.8	2.70366e-15	6.94222e-14	5.49204e-05	0.000330816	0.000449602	0.00161952										2.2
-2.15	-0.8	5.84838e-15	2.75832e-14	8.26447e-05	0.000462805	0.000588995	0.00193247										2.15
-2.1	-0.8	6.589e-15	1.42648e-14	0.00012206	0.000594825	0.000765935	0.0022455										2.1
-2.05	-0.8	1.63946e-15	1.003e-13	0.000179361	0.000804244	0.000995136	0.00265568										2.05
-2	-0.8	7.60991e-15	1.57595e-13	0.000255889	0.000985813	0.00127747	0.00301751										2
-1.95	-0.8	4.21703e-14	4.74876e-13	0.000360254	0.00135843	0.00162963	0.00351182										1.95
-1.9	-0.8	3.16358e-13	2.59257e-13	0.000501169	0.00167962	0.00206791	0.00394046										1.9
-1.85	-0.8	1.74476e-13	4.01366e-12	0.000701747	0.00212079	0.00261087	0.00439149										1.85
-1.8	-0.8	7.63124e-13	1.59581e-11	0.000973407	0.00259868	0.00328069	0.00485519										1.8
-1.75	-0.8	2.71533e-12	4.99493e-12	0.00132289	0.00317561	0.00409032	0.0052788										1.75
-1.7	-0.8	1.23218e-12	4.7518e-11	0.00179813	0.00377492	0.00507251	0.00565201										1.7
-1.65	-0.8	3.84352e-11	1.69236e-10	0.00240133	0.00438055	0.00624304	0.00596793										1.65
-1.6	-0.8	6.33887e-11	6.15993e-11	0.00319227	0.00507942	0.00763737	0.00621943										1.6
-1.55	-0.8	1.31468e-11	1.68445e-09	0.00420192	0.00575898	0.00927164	0.0063467										1.55
-1.5	-0.8	3.08781e-10	5.23944e-10	0.00547242	0.006365	0.0111679	0.00636464										1.5
-1.45	-0.8	2.09604e-09	1.38175e-08	0.00705639	0.0070204	0.0133498	0.00637173										1.45
-1.4	-0.8	4.75767e-10	2.3502e-08	0.00899559	0.00737448	0.0158223	0.00612274										1.4
-1.35	-0.8	3.41572e-09	2.20287e-07	0.0113491	0.00771852	0.0185878	0.00575582										1.35
-1.3	-0.8	2.83323e-07	8.33089e-08	0.0141781	0.0077144	0.0216183	0.00524607										1.3
-1.25	-0.8	2.06845e-07	3.29422e-06	0.0174421	0.00754398	0.0249019	0.00472781										1.25
-1.2	-0.8	4.88436e-07	1.34221e-05	0.021203	0.00728019	0.0284347	0.00415446										1.2
-1.15	-0.8	1.30941e-06	3.1512e-05	0.0253998	0.00667535	0.0321806	0.00356874										1.15
-1.1	-0.8	1.261e-05	9.64201e-05	0.0300018	0.00599793	0.0361147	0.00298205										1.1
-1.05	-0.8	4.16993e-05	0.00023888	0.0349678	0.00512852	0.0402464	0.00239559										1.05
-1	-0.8	0.000139897	0.000541553	0.0402293	0.00435101	0.0445736	0.00187944										1
-0.95	-0.8	0.000337023	0.00114343	0.045664	0.00344866	0.049057	0.00144204										0.95
-0.9	-0.8	0.000882622	0.00222865	0.0513734	0.00262853	0.0538686	0.00105501										0.9
-0.85	-0.8	0.00197745	0.00401464	0.0572293	0.00194567	0.0589302	0.000746342										0.85
-0.8	-0.8	0.00407211	0.00673906	0.0633835	0.00140396	0.0644203	0.000524205										0.8
-0.75	-0.8	0.00797313	0.0106094	0.0698993	0.000924425	0.070425	0.000335061										0.75
-0.7	-0.8	0.014638	0.0140427	0.0768955	0.000579365	0.0770493	0.000203373										0.7
-0.65	-0.8	0.0253359	0.0170726	0.0845098	0.000363705	0.0844216	0.000126203										0.65
-0.6	-0.8	0.0408932	0.0177666	0.0931778	0.000213317	0.0929423	7.2846e-05										0.6
-0.55	-0.8	0.0616168	0.0170711	0.102729	9.90278e-05	0.102423	3.28943e-05										0.55
-0.5	-0.8	0.0858379	0.0126347	0.114034	5.77561e-05	0.113705	1.9227e-05										0.5
-0.45	-0.8	0.111233	0.00834712	0.127232	2.45072e-05	0.126908	8.07466e-06										0.45
-0.4	-0.8	0.135793	0.00447898	0.142887	1.02892e-05	0.142588	3.37545e-06										0.4
-0.35	-0.8	0.159776	0.00196396	0.161697	3.59095e-06	0.161432	1.1729e-06										0.35
-0.3	-0.8	0.184674	0.000725416	0.184173	1.07804e-06	0.183946	3.51008e-07										0.3
-0.25	-0.8	0.213966	0.000211631	0.212663	2.41213e-07	0.212475	7.68687e-08										0.25
-0.2	-0.8	0.246902	6.05415e-05	0.245614	5.92098e-08	0.245464	1.77397e-08										0.2
-0.15	-0.8	0.282117	8.0557e-06	0.281073	1.97179e-09	0.280961	2.1287e-09										0.15
-0.1	-0.8	0.292177	1.17612e-06	0.291462	7.06968e-09	0.291388	3.55539e-09										0.1
-0.05	-0.8	0.223542	6.81297e-08	0.223178	1.39334e-09	0.223141	6.70691e-10										0.05
0	-0.8	0.0058928	3.95873e-08	0.00589636	8.69531e-10	0.00589553	4.27829e-10										0

## Sheet: convec, t=0.7
x	y	Case #1: Q = 13LPM	Case #2: Q = 22LPM	convective x	Case #1: Q = 13LPM	Case #2: Q = 22LPM	diffusive											Q = 12LPM, t = 0.7h
-3	-0.8	5.23226e-19	1.25133e-16		5.71463e-17	6.75993e-15										3		Q = 21LPM, t = 0.7h
-2.95	-0.8	1.2171e-18	2.50019e-16		6.01949e-17	7.28702e-15										2.95
-2.9	-0.8	3.19815e-18	6.8619e-16		6.32439e-17	7.81424e-15										2.9
-2.85	-0.8	5.44261e-18	1.18941e-15		6.62934e-17	8.34159e-15										2.85
-2.8	-0.8	2.78519e-18	9.06712e-16		2.17214e-16	2.25618e-14										2.8
-2.75	-0.8	1.67219e-17	2.47167e-15		4.22538e-16	3.88043e-14										2.75
-2.7	-0.8	2.99806e-17	4.7442e-15		2.54678e-16	2.61299e-14										2.7
-2.65	-0.8	3.79092e-17	6.33238e-15		8.67973e-17	1.34527e-14										2.65
-2.6	-0.8	5.27654e-17	6.87855e-15		1.67029e-15	1.05074e-13										2.6
-2.55	-0.8	1.77208e-17	1.53262e-15		1.77799e-15	1.24052e-13										2.55
-2.5	-0.8	1.54289e-16	1.70993e-14		5.86233e-16	6.59718e-14										2.5
-2.45	-0.8	1.74212e-16	2.24575e-14		4.07162e-17	4.32332e-14										2.45
-2.4	-0.8	7.13166e-17	2.11995e-14		6.3107e-15	1.85878e-13										2.4
-2.35	-0.8	2.6311e-16	1.72808e-16		6.96088e-15	2.95433e-13										2.35
-2.3	-0.8	6.65354e-16	3.34937e-14		7.61122e-15	4.05026e-13										2.3
-2.25	-0.8	1.95198e-15	2.4637e-14		4.19088e-14	2.53302e-12										2.25
-2.2	-0.8	2.70366e-15	6.68647e-13		6.94222e-14	4.6929e-12										2.2
-2.15	-0.8	5.84838e-15	8.99506e-13		2.75832e-14	1.16679e-12										2.15
-2.1	-0.8	6.589e-15	4.66129e-13		1.42648e-14	7.02878e-12										2.1
-2.05	-0.8	1.63946e-15	2.60436e-12		1.003e-13	2.66418e-11										2.05
-2	-0.8	7.60991e-15	5.79647e-12		1.57595e-13	2.02609e-11										2
-1.95	-0.8	4.21703e-14	2.20693e-12		4.74876e-13	1.49848e-10										1.95
-1.9	-0.8	3.16358e-13	1.07942e-10		2.59257e-13	3.71214e-10										1.9
-1.85	-0.8	1.74476e-13	1.13417e-10		4.01366e-12	3.79388e-10										1.85
-1.8	-0.8	7.63124e-13	4.06382e-11		1.59581e-11	1.90474e-09										1.8
-1.75	-0.8	2.71533e-12	3.97136e-10		4.99493e-12	5.53492e-10										1.75
-1.7	-0.8	1.23218e-12	5.53823e-10		4.7518e-11	6.17058e-10										1.7
-1.65	-0.8	3.84352e-11	7.78581e-10		1.69236e-10	7.29263e-09										1.65
-1.6	-0.8	6.33887e-11	5.56062e-09		6.15993e-11	4.49099e-08										1.6
-1.55	-0.8	1.31468e-11	1.06302e-08		1.68445e-09	1.31983e-07										1.55
-1.5	-0.8	3.08781e-10	5.18266e-08		5.23944e-10	2.91993e-07										1.5
-1.45	-0.8	2.09604e-09	5.93158e-07		1.38175e-08	5.08303e-06										1.45
-1.4	-0.8	4.75767e-10	1.33718e-06		2.3502e-08	3.47126e-07										1.4
-1.35	-0.8	3.41572e-09	1.66107e-06		2.20287e-07	6.06244e-06										1.35
-1.3	-0.8	2.83323e-07	1.45578e-05		8.33089e-08	1.30503e-05										1.3
-1.25	-0.8	2.06845e-07	2.34334e-06		3.29422e-06	0.000145943										1.25
-1.2	-0.8	4.88436e-07	3.352e-05		1.34221e-05	9.78211e-05										1.2
-1.15	-0.8	1.30941e-06	0.000218382		3.1512e-05	0.00090717										1.15
-1.1	-0.8	1.261e-05	0.000737619		9.64201e-05	0.00197489										1.1
-1.05	-0.8	4.16993e-05	0.00196465		0.00023888	0.00398928										1.05
-1	-0.8	0.000139897	0.00448762		0.000541553	0.00644121										1
-0.95	-0.8	0.000337023	0.00934717		0.00114343	0.0104317										0.95
-0.9	-0.8	0.000882622	0.0178734		0.00222865	0.0150566										0.9
-0.85	-0.8	0.00197745	0.0315714		0.00401464	0.0180854										0.85
-0.8	-0.8	0.00407211	0.0516452		0.00673906	0.0192164										0.8
-0.75	-0.8	0.00797313	0.077152		0.0106094	0.0165925										0.75
-0.7	-0.8	0.014638	0.105304		0.0140427	0.0128531										0.7
-0.65	-0.8	0.0253359	0.132669		0.0170726	0.00788211										0.65
-0.6	-0.8	0.0408932	0.157639		0.0177666	0.00431945										0.6
-0.55	-0.8	0.0616168	0.179446		0.0170711	0.00156266										0.55
-0.5	-0.8	0.0858379	0.201234		0.0126347	0.000794393										0.5
-0.45	-0.8	0.111233	0.224808		0.00834712	0.000220477										0.45
-0.4	-0.8	0.135793	0.2518		0.00447898	6.71525e-05										0.4
-0.35	-0.8	0.159776	0.283975		0.00196396	1.50232e-05										0.35
-0.3	-0.8	0.184674	0.322387		0.000725416	2.56885e-06										0.3
-0.25	-0.8	0.213966	0.371164		0.000211631	3.58951e-07										0.25
-0.2	-0.8	0.246902	0.427646		6.05415e-05	5.02709e-07										0.2
-0.15	-0.8	0.282117	0.488432		8.0557e-06	4.05152e-07										0.15
-0.1	-0.8	0.292177	0.505845		1.17612e-06	3.16971e-07										0.1
-0.05	-0.8	0.223542	0.386999		6.81297e-08	5.4168e-08										0.05
0	-0.8	0.0058928	0.0101981		3.95873e-08	1.83541e-08										0

## Sheet: layer convec&diff y profiles
x	y	convective flux,	diffusive flux,	convective flux,	diffusive flux,	convective flux,	diffusive flux,		x	convective flux,	diffusive flux,	convective flux,	diffusive flux,	convective flux,	diffusive flux,		x	convective flux,	diffusive flux,	convective flux,	diffusive flux,	convective flux,	diffusive flux,
		x=0, t=0.7h	x=0, t=0.7h	x=0, t=4h	x=0, t=4h	x=0, t=6h	x=0, t=6h			x=0.61m, t=0.7h	x=0.61m, t=0.7h	x=0.61m, t=4h	x=0.61m, t=4h	x=0.61m, t=6h	x=0.61m, t=6h			x=1.22m, t=0.7h	x=1.22m, t=0.7h	x=1.22m, t=4h	x=1.22m, t=4h	x=1.22m, t=6h	x=1.22m, t=6h
0	-0.5	0.0700068	0.0151272	0.0805121	0.00173263	0.0809293	0.00166301		0.61	0.162813	0.00447988	0.216726	4.13241e-05	0.220847	3.45023e-05		1.22	1.01619e-05	0.000111837	0.00833934	0.00490362	0.00905909	0.00347433
0	-0.49	0.0546725	0.0164112	0.0644254	0.00191093	0.0647684	0.00183549		0.61	0.163835	0.00469568	0.220136	4.57745e-05	0.224317	3.83198e-05		1.22	7.52181e-06	0.000112261	0.00670293	0.00513549	0.00729712	0.00365087
0	-0.48	0.040049	0.0176964	0.0484625	0.0020894	0.048727	0.00200812		0.61	0.164402	0.0049146	0.223074	4.83285e-05	0.227305	4.04376e-05		1.22	5.1714e-06	0.000112685	0.00504722	0.00536757	0.00550635	0.00382758
0	-0.47	0.026203	0.0189827	0.0326336	0.00226802	0.032815	0.0021809		0.61	0.164966	0.00512917	0.226182	5.41729e-05	0.230471	4.5503e-05		1.22	3.1265e-06	0.00011311	0.00337479	0.00559986	0.00368874	0.00400444
0	-0.46	0.0131992	0.0202702	0.016949	0.0024468	0.0170426	0.00235384		0.61	0.165656	0.00525122	0.229491	5.98081e-05	0.233841	4.96321e-05		1.22	1.40308e-06	0.000113535	0.00168828	0.00583236	0.00184633	0.00418147
0	-0.45	0.000912324	0.0189577	0.00105965	0.00215865	0.00106939	0.00207483		0.61	0.165847	0.00548069	0.232376	6.60334e-05	0.236782	5.56028e-05		1.22	2.94977e-07	0.000138374	0.000282356	0.0058755	0.000310203	0.00414028
0	-0.44	0.000812227	0.0182249	0.00103612	0.00225083	0.00104631	0.00216818		0.61	0.165824	0.00570965	0.235123	7.22528e-05	0.239584	6.15684e-05		1.22	1.90041e-07	0.000118106	0.000272005	0.00584781	0.000302013	0.0042215
0	-0.43	0.000721552	0.0175082	0.00101339	0.00234152	0.00102402	0.00226001		0.61	0.165589	0.00593796	0.237733	7.84636e-05	0.242245	6.75266e-05		1.22	1.04466e-07	9.79387e-05	0.000262108	0.00582041	0.000294037	0.0043023
0	-0.42	0.000639543	0.0168068	0.000991465	0.00243076	0.00100251	0.00235034		0.61	0.164375	0.00662178	0.239525	9.27497e-05	0.244079	8.14109e-05		1.22	3.71615e-08	7.78679e-05	0.000252645	0.00579329	0.000286271	0.0043827
0	-0.41	0.000565488	0.0161198	0.000970319	0.00251854	0.000981757	0.00243919		0.61	0.163339	0.00693633	0.241504	0.000103717	0.246101	9.2644e-05		1.22	-1.29235e-08	5.78915e-05	0.000243601	0.00576643	0.000278706	0.00446268
0	-0.4	0.000495814	0.0156059	0.000948754	0.00267302	0.000960622	0.002593		0.61	0.162032	0.00725057	0.243273	0.000114676	0.247909	0.00010387		1.22	6.51904e-08	3.45638e-05	0.000234405	0.00579665	0.00027078	0.00459416
0	-0.39	0.000435521	0.0148568	0.000928888	0.00272788	0.000941119	0.00264998		0.61	0.160699	0.00801468	0.245236	9.03794e-05	0.249907	7.92294e-05		1.22	4.24646e-08	2.6497e-05	0.000226113	0.0057367	0.000263571	0.00463947
0	-0.38	0.000381648	0.0141209	0.000909798	0.00278178	0.000922366	0.00270596		0.61	0.15878	0.0083383	0.246692	0.000134286	0.251396	0.000122736		1.22	2.61527e-08	1.84663e-05	0.000218216	0.00567714	0.000256566	0.00468455
0	-0.37	0.000333578	0.0133975	0.00089146	0.00283471	0.000904342	0.00276093		0.61	0.156584	0.00866216	0.247891	0.000178184	0.252626	0.000166232		1.22	1.5873e-08	1.04705e-05	0.000210695	0.00561797	0.000249757	0.00472941
0	-0.36	0.000290735	0.0126857	0.000873853	0.00288669	0.000887025	0.00281488		0.61	0.15412	0.00898621	0.248833	0.000222074	0.253596	0.000209722		1.22	1.12593e-08	2.50877e-06	0.000203534	0.00555916	0.000243137	0.00477403
0	-0.35	0.000250196	0.0113773	0.000853477	0.00300851	0.000866916	0.00293872		0.61	0.150774	0.00906734	0.248619	0.000131077	0.253394	0.000113003		1.22	1.60991e-08	6.72845e-06	0.000195972	0.00550222	0.000235842	0.00487863
0	-0.34	0.000217913	0.0105178	0.000837073	0.00316792	0.000850749	0.00310139		0.61	0.148058	0.00954294	0.249374	0.000261476	0.254175	0.000243338		1.22	1.20742e-08	4.94603e-06	0.000189454	0.00549866	0.000229476	0.00499948
0	-0.33	0.000189564	0.00967016	0.000820811	0.00332467	0.000834689	0.00326132		0.61	0.145091	0.0100198	0.249875	0.000391926	0.254697	0.000373722		1.22	9.32364e-09	3.17092e-06	0.000183135	0.00549512	0.000223141	0.00511966
0	-0.32	0.000164757	0.00883381	0.000804683	0.00347877	0.000818729	0.00341851		0.61	0.141878	0.0104972	0.250115	0.00052243	0.254953	0.000504158		1.22	7.76994e-09	1.40293e-06	0.000177006	0.00549162	0.000216835	0.00523918
0	-0.31	0.000143142	0.00800824	0.000788679	0.00363025	0.00080286	0.00357299		0.61	0.137341	0.0119946	0.250724	-0.000458851	0.255571	-0.000475896		1.22	7.35239e-09	-3.58074e-07	0.000171056	0.00548813	0.000210555	0.00535804
0	-0.3	0.000114152	0.00704552	0.000776069	0.0035395	0.000790267	0.00348663		0.61	0.133232	0.0122072	0.250626	3.41033e-05	0.255483	1.9291e-05		1.22	-1.21551e-07	4.70605e-06	0.000170443	0.00536436	0.000210388	0.00535131
0	-0.29	9.97491e-05	0.00584042	0.000768311	0.00349029	0.000782692	0.0034406		0.61	0.129038	0.0124124	0.250145	0.000527238	0.255005	0.000514665		1.22	-1.21061e-07	-6.79613e-06	0.000166313	0.00526059	0.000205945	0.00536581
0	-0.28	8.81082e-05	0.0046589	0.000758773	0.00347193	0.000773261	0.00342599		0.61	0.124769	0.0126102	0.249285	0.00101968	0.254139	0.00100935		1.22	-1.13516e-07	-1.82514e-05	0.000162528	0.00515721	0.000201754	0.00538006
0	-0.27	7.93747e-05	0.00349182	0.000750461	0.00345329	0.000765047	0.00341104		0.61	0.120432	0.0128002	0.248048	0.00151056	0.252888	0.00150247		1.22	-9.87556e-08	-2.96595e-05	0.000159062	0.00505422	0.000197791	0.00539404
0	-0.26	7.34408e-05	0.00233916	0.000743305	0.00343434	0.000757982	0.00339572		0.61	0.116035	0.0129821	0.246437	0.00199902	0.251254	0.00199316		1.22	-7.65034e-08	-4.10198e-05	0.000155889	0.00495159	0.000194029	0.00540772
0	-0.25	7.0268e-05	0.00120105	0.000737236	0.00341503	0.000751995	0.00337996		0.61	0.111586	0.0131553	0.244455	0.00248417	0.249241	0.00248055		1.22	-4.63634e-08	-5.23315e-05	0.000152984	0.00484931	0.000190441	0.00542108
0	-0.24	0.000189627	0.00269371	0.00229832	0.00382946	0.00235459	0.00376553		0.61	0.107092	0.0133194	0.242106	0.00296511	0.246852	0.0029637		1.22	8.89511e-08	-7.39964e-06	-0.000360227	0.00446408	-0.000432632	0.00519963
0	-0.23	0.000420241	0.00268364	0.00527838	0.0051931	0.00541136	0.00513857		0.61	0.102684	0.0138026	0.23927	0.00382751	0.243973	0.00384042		1.22	-1.62364e-06	-1.18174e-05	0.000894715	0.00542552	0.00110512	0.00630063
0	-0.22	0.00062324	0.00267304	0.00803937	0.00654152	0.00824406	0.00649632		0.61	0.0989508	0.0137229	0.237412	0.00354155	0.242098	0.00363007		1.22	-3.15133e-06	-1.6187e-05	0.00201747	0.00637581	0.00247958	0.00738884
0	-0.21	0.000799631	0.00266192	0.0105659	0.00787394	0.0108368	0.00783796		0.61	0.0944828	0.0141421	0.23399	0.00499482	0.238576	0.00508601		1.22	-4.46642e-06	-2.05058e-05	0.0030037	0.00731439	0.00368581	0.00846361
0	-0.2	0.000950425	0.00265023	0.0128447	0.0091895	0.0131761	0.00916266		0.61	0.0899723	0.0145506	0.229935	0.00642971	0.234406	0.00652349		1.22	-5.54603e-06	-2.47712e-05	0.00385056	0.00824062	0.00472065	0.00952424
0	-0.19	0.00107664	0.00263796	0.0148649	0.0104873	0.0152506	0.0104695		0.61	0.0854298	0.01535	0.22944	0.0036165	0.233849	0.00356258		1.22	-6.37204e-06	-2.89804e-05	0.00455671	0.00915388	0.00558276	0.01057
0	-0.18	0.00118281	0.00263566	0.0165495	0.011761	0.0169811	0.0117521		0.61	0.0807208	0.0155786	0.224694	0.0065599	0.229032	0.00651408		1.22	2.08885e-06	-2.10314e-06	0.00485425	0.00982471	0.00594628	0.0114025
0	-0.17	0.00122351	0.00114435	0.0173249	0.00801142	0.0177786	0.00791061		0.61	0.0760454	0.0157988	0.218861	0.00946302	0.223102	0.00942521		1.22	6.13836e-07	-2.54212e-05	0.00486254	0.00766583	0.00598716	0.00935372
0	-0.16	0.00133567	0.00146068	0.0189783	0.0106057	0.0194808	0.0105438		0.61	0.0714064	0.0160103	0.211992	0.0123235	0.216113	0.0122936		1.22	1.07662e-06	-1.93819e-05	0.0053566	0.00892124	0.0065826	0.0108111
0	-0.15	0.00142018	0.00177218	0.0202554	0.0131609	0.0207967	0.0131373		0.61	0.0668068	0.0162131	0.204142	0.015139	0.208122	0.0151168		1.22	1.50241e-06	-1.34188e-05	0.00573699	0.0101564	0.00703697	0.0122449
0	-0.14	0.00147527	0.00207858	0.0211425	0.0156748	0.0217118	0.0156891		0.61	0.0635182	0.0160701	0.192106	0.0215266	0.195768	0.0215523		1.22	1.85351e-06	-7.53618e-06	0.00600162	0.0113703	0.00734832	0.0136538
0	-0.13	0.00149956	0.00237962	0.0216322	0.0181452	0.0222185	0.0181967		0.61	0.0589833	0.0165514	0.180999	0.0247133	0.18444	0.0247349		1.22	2.09661e-06	-1.73844e-06	0.00614981	0.0125617	0.00751646	0.0150365
0	-0.12	0.0014921	0.00267499	0.0217233	0.0205696	0.0223152	0.0206577		0.61	0.0544499	0.0170183	0.169084	0.0278393	0.17229	0.0278567		1.22	2.20276e-06	3.96962e-06	0.00618231	0.0137295	0.00754295	0.0163915
0	-0.11	0.0014523	0.00296439	0.0214207	0.0229456	0.022007	0.0230697		0.61	0.0499203	0.01747	0.156452	0.0309013	0.159411	0.0309146		1.22	2.14735e-06	9.58295e-06	0.00610128	0.0148723	0.00743108	0.0177174
0	-0.1	0.00175053	0.00467373	0.0216473	0.0265689	0.0222319	0.0267316		0.61	0.0453968	0.0179058	0.143203	0.0338957	0.145904	0.033905		1.22	6.26434e-06	2.03537e-05	0.00597061	0.0172955	0.00731301	0.0202804
0	-0.09	0.00158642	0.00527261	0.0204938	0.029063	0.0210487	0.029257		0.61	0.0408812	0.0183248	0.129438	0.036819	0.131874	0.0368243		1.22	5.88737e-06	2.41519e-05	0.00563857	0.0182821	0.00690344	0.0215121
0	-0.08	0.00136377	0.00585756	0.0189259	0.0314953	0.0194399	0.0317201		0.61	0.0363754	0.0187261	0.115267	0.0396672	0.117432	0.0396685		1.22	5.31492e-06	2.78668e-05	0.00520946	0.0192407	0.00637422	0.0227097
0	-0.07	0.00108531	0.0064278	0.0169905	0.0338624	0.0174537	0.0341172		0.61	0.0318811	0.0191089	0.100803	0.0424363	0.102692	0.0424337		1.22	4.54435e-06	3.14936e-05	0.00469102	0.0201699	0.00573569	0.0238713
0	-0.06	0.000755006	0.00698252	0.0147431	0.0361609	0.0151472	0.0364449		0.61	0.0273998	0.0194721	0.0861621	0.045122	0.0877741	0.0451155		1.22	-5.34459e-06	9.95161e-05	0.00482174	0.0213409	0.00569882	0.0249857
0	-0.05	0.000536042	0.00482915	0.0123193	0.0364546	0.0126622	0.0367837		0.61	0.0229331	0.0198148	0.0714668	0.0477197	0.0728017	0.0477094		1.22	-9.21678e-06	0.000132509	0.00405728	0.0228984	0.0047802	0.026687
0	-0.04	0.000271557	0.00509692	0.0098643	0.0384571	0.0101408	0.038817		0.61	0.0184823	0.0201359	0.0568428	0.0502249	0.0579032	0.0502108		1.22	-1.42249e-05	0.000164669	0.00321848	0.0244053	0.00378093	0.028332
0	-0.03	-1.708e-05	0.00535463	0.00727122	0.0403842	0.00747803	0.0407739		0.61	0.0140489	0.0204343	0.0424196	0.0526325	0.0432104	0.0526147		1.22	-2.02967e-05	0.00019595	0.00233482	0.025859	0.00273701	0.0299177
0	-0.02	-0.000327611	0.00560175	0.00459987	0.0422319	0.00473582	0.0426504		0.61	0.00963424	0.0207088	0.02833	0.0549374	0.0288586	0.054916		1.22	-2.73204e-05	0.000226303	0.00143912	0.0272565	0.0016882	0.0314409
0	-0.01	-0.000657374	0.00583772	0.00191522	0.043996	0.00198125	0.0444421		0.61	0.00523984	0.0209583	0.0147102	0.0571342	0.0149864	0.0571091		1.22	-3.51463e-05	0.000255675	0.000567322	0.028595	0.000677848	0.0328982
0	0	-0.00100256	0.00606195	-0.000718068	0.045672	-0.000718522	0.0461446		0.61	0.00409996	0.0204409	0.00272973	0.0613212	0.00269824	0.061423		1.22	-4.35871e-05	0.000284013	-0.000244502	0.0298713	-0.000250387	0.0342862

## Sheet: layer horizontal xm
x	y	t = 0.7h	t = 4h	t = 6h	t = 0.7h	t = 4h	t = 6h
-2	-0.35	0	0.23525	0.510722	0	23.525	51.0722
-1.95	-0.35	2.83755e-11	0.276428	0.55165	2.83755e-09	27.6428	55.165
-1.9	-0.35	1.60744e-10	0.322631	0.591896	1.60744e-08	32.2631	59.1896
-1.85	-0.35	0	0.368233	0.627119	0	36.8233	62.7119
-1.8	-0.35	0	0.412791	0.655272	0	41.2791	65.5272
-1.75	-0.35	2.72576e-10	0.458189	0.682024	2.72576e-08	45.8189	68.2024
-1.7	-0.35	9.91025e-09	0.498961	0.701622	9.91025e-07	49.8961	70.1622
-1.65	-0.35	9.92533e-08	0.535427	0.718029	9.92533e-06	53.5427	71.8029
-1.6	-0.35	0	0.556512	0.723202	0	55.6512	72.3202
-1.55	-0.35	3.6575e-07	0.565886	0.719918	3.6575e-05	56.5886	71.9918
-1.5	-0.35	0	0.543762	0.693868	0	54.3762	69.3868
-1.45	-0.35	1.53254e-07	0.522652	0.664553	1.53254e-05	52.2652	66.4553
-1.4	-0.35	3.46739e-07	0.516903	0.647072	3.46739e-05	51.6903	64.7072
-1.35	-0.35	0	0.522015	0.637105	0	52.2015	63.7105
-1.3	-0.35	0	0.537623	0.637593	0	53.7623	63.7593
-1.25	-0.35	3.05494e-05	0.560793	0.646772	0.00305494	56.0793	64.6772
-1.2	-0.35	3.39569e-05	0.592092	0.663589	0.00339569	59.2092	66.3589
-1.15	-0.35	0.000276571	0.627983	0.68638	0.0276571	62.7983	68.638
-1.1	-0.35	0.000774759	0.66833	0.714902	0.0774759	66.833	71.4902
-1.05	-0.35	0.00127576	0.70849	0.74375	0.127576	70.849	74.375
-1	-0.35	0.00766151	0.750548	0.775851	0.766151	75.0548	77.5851
-0.95	-0.35	0.0376889	0.789953	0.805949	3.76889	78.9953	80.5949
-0.9	-0.35	0.0887407	0.822561	0.83081	8.87407	82.2561	83.081
-0.85	-0.35	0.150915	0.834766	0.839775	15.0915	83.4766	83.9775
-0.8	-0.35	0.237745	0.841973	0.84473	23.7745	84.1973	84.473
-0.75	-0.35	0.344325	0.845563	0.846987	34.4325	84.5563	84.6987
-0.7	-0.35	0.463659	0.847724	0.848434	46.3659	84.7724	84.8434
-0.65	-0.35	0.57665	0.848558	0.848899	57.665	84.8558	84.8899
-0.6	-0.35	0.667547	0.848638	0.848835	66.7547	84.8638	84.8835
-0.55	-0.35	0.727712	0.848289	0.848459	72.7712	84.8289	84.8459
-0.5	-0.35	0.760883	0.847665	0.847852	76.0883	84.7665	84.7852
-0.45	-0.35	0.771218	0.846633	0.84687	77.1218	84.6633	84.687
-0.4	-0.35	0.761553	0.84485	0.845171	76.1553	84.485	84.5171
-0.35	-0.35	0.730025	0.842367	0.842815	73.0025	84.2367	84.2815
-0.3	-0.35	0.647852	0.835671	0.836421	64.7852	83.5671	83.6421
-0.25	-0.35	0.505283	0.821058	0.822423	50.5283	82.1058	82.2423
-0.2	-0.35	0.389513	0.805047	0.806992	38.9513	80.5047	80.6992
-0.15	-0.35	0.323089	0.789742	0.792154	32.3089	78.9742	79.2154
-0.1	-0.35	0.291529	0.7748	0.777529	29.1529	77.48	77.7529
-0.05	-0.35	0.275932	0.767232	0.770154	27.5932	76.7232	77.0154
0	-0.35	0.270027	0.762383	0.765331	27.0027	76.2383	76.5331
0.05	-0.35	0.274143	0.764716	0.767547	27.4143	76.4716	76.7547
0.1	-0.35	0.290548	0.772646	0.775226	29.0548	77.2646	77.5226
0.15	-0.35	0.327305	0.786422	0.788629	32.7305	78.6422	78.8629
0.2	-0.35	0.395089	0.801468	0.803213	39.5089	80.1468	80.3213
0.25	-0.35	0.510866	0.81854	0.819757	51.0866	81.854	81.9757
0.3	-0.35	0.65353	0.834385	0.835063	65.353	83.4385	83.5063
0.35	-0.35	0.723851	0.841321	0.841757	72.3851	84.1321	84.1757
0.4	-0.35	0.759347	0.844322	0.844625	75.9347	84.4322	84.4625
0.45	-0.35	0.770153	0.846264	0.846484	77.0153	84.6264	84.6484
0.5	-0.35	0.761041	0.847335	0.847517	76.1041	84.7335	84.7517
0.55	-0.35	0.726588	0.847954	0.848129	72.6588	84.7954	84.8129
0.6	-0.35	0.664324	0.84832	0.848542	66.4324	84.832	84.8542
0.65	-0.35	0.575334	0.847915	0.848303	57.5334	84.7915	84.8303
0.7	-0.35	0.465817	0.84711	0.847877	46.5817	84.711	84.7877
0.75	-0.35	0.347047	0.845273	0.846752	34.7047	84.5273	84.6752
0.8	-0.35	0.237535	0.841373	0.844226	23.7535	84.1373	84.4226
0.85	-0.35	0.15029	0.834885	0.839974	15.029	83.4885	83.9974
0.9	-0.35	0.0885502	0.822104	0.830486	8.85502	82.2104	83.0486
0.95	-0.35	0.0382757	0.78988	0.80577	3.82757	78.988	80.577
1	-0.35	0.00752242	0.749233	0.774744	0.752242	74.9233	77.4744
1.05	-0.35	0	0.705931	0.742086	0	70.5931	74.2086
1.1	-0.35	0.00029845	0.665131	0.71224	0.029845	66.5131	71.224
1.15	-0.35	0.00023297	0.624755	0.683746	0.023297	62.4755	68.3746
1.2	-0.35	9.58102e-05	0.588637	0.660981	0.00958102	58.8637	66.0981
1.25	-0.35	4.36601e-05	0.558555	0.644906	0.00436601	55.8555	64.4906
1.3	-0.35	4.85757e-06	0.534691	0.635395	0.000485757	53.4691	63.5395
1.35	-0.35	4.44011e-06	0.519465	0.634859	0.000444011	51.9465	63.4859
1.4	-0.35	1.11154e-06	0.51381	0.643629	0.000111154	51.381	64.3629
1.45	-0.35	5.42796e-07	0.519145	0.661885	5.42796e-05	51.9145	66.1885
1.5	-0.35	0	0.542201	0.693224	0	54.2201	69.3224
1.55	-0.35	4.03318e-07	0.562824	0.719399	4.03318e-05	56.2824	71.9399
1.6	-0.35	0	0.554707	0.723087	0	55.4707	72.3087
1.65	-0.35	1.2203e-07	0.533834	0.717055	1.2203e-05	53.3834	71.7055
1.7	-0.35	7.33916e-08	0.498069	0.701383	7.33916e-06	49.8069	70.1383
1.75	-0.35	6.5012e-09	0.455672	0.679257	6.5012e-07	45.5672	67.9257
1.8	-0.35	7.5592e-09	0.410274	0.652735	7.5592e-07	41.0274	65.2735
1.85	-0.35	2.02461e-09	0.363367	0.619377	2.02461e-07	36.3367	61.9377
1.9	-0.35	7.52097e-10	0.317899	0.584162	7.52097e-08	31.7899	58.4162
1.95	-0.35	3.3361e-10	0.274816	0.546436	3.3361e-08	27.4816	54.6436
2	-0.35	7.13253e-11	0.234515	0.506539	7.13253e-09	23.4515	50.6539

## Sheet: Sw(0.05vs0.25)
x	y	xm	convective, x	diffusive, x	xm	convective, x	diffusive, x		x	y	xm	convective, x	diffusive, x	xm	advective, x	diffusive, x		t=6	x	y	xm	advective,	diffusive,	Savitzky-Golay	xm	advective,	diffusive,	Savitzky-Golay
		Sw=0.05, t=0.7h			Sw=0.05, t=6.0h						Sw=0.25, t=0.7h			Sw=0.25, t=6.0h								Sw=0.05	Sw=0.05	smooth		Sw=0.25	Sw=0.25	smooth
0	-0.6	84.999	0.00142799	6.41978e-07	85	0.00140946	1.04501e-08		0	-0.6	85.0047	0.0014134	4.64894e-07	85	0.00133299	9.23799e-09			0	-3	12.0521	4.14971e-05	0.0012081	0.000304471	19.0028	0.000108133	0.00142694	0.000441498
0.1	-0.6	84.997	0.101955	8.79628e-06	85	0.100055	4.05199e-08		0.1	-0.6	85.0058	0.101674	6.39706e-07	85	0.0997995	6.73462e-09			0.01	-3	12.0569	0.00031151	0.000755225	0.000680671	19.0139	0.000667035	0.000957379	0.00081821
0.2	-0.6	84.9787	0.158623	7.15468e-05	84.9999	0.154943	2.64644e-07		0.2	-0.6	85.007	0.15812	1.75905e-07	85	0.154479	6.43124e-08			0.02	-3	12.0594	0.000581399	0.000302352	0.00105276	19.0206	0.00122578	0.000487813	0.00119045
0.3	-0.6	84.8501	0.171447	0.000182564	84.9997	0.166487	2.31014e-07		0.3	-0.6	85.0069	0.171216	7.46216e-08	84.9999	0.165871	2.68776e-08			0.03	-3	12.0671	0.000789972	0.000942238	0.00142075	19.0421	0.00164798	0.00103446	0.00155821
0.4	-0.6	83.892	0.160106	0.00221511	84.9986	0.156763	2.42871e-06		0.4	-0.6	84.9853	0.162925	4.13361e-05	84.9996	0.156037	1.30151e-07			0.04	-3	12.0615	0.00105679	0.00139653	0.00178462	19.0303	0.00219885	0.00151152	0.00192149
0.5	-0.6	79.9235	0.133397	0.00588446	84.9933	0.139668	7.36316e-06		0.5	-0.6	84.7217	0.146503	0.000218225	84.9989	0.138905	4.15131e-07			0.05	-3	12.0536	0.0013223	0.00185082	0.00214439	19.014	0.0027466	0.00198859	0.0022803
0.6	-0.6	69.1265	0.0938207	0.0130052	84.9806	0.121736	1.43731e-05		0.6	-0.6	82.9422	0.1254	0.00106842	84.999	0.121003	1.68377e-07			0.06	-3	12.0435	0.00158637	0.00230511	0.00250005	18.9933	0.00329085	0.00246565	0.00263463
0.7	-0.6	50.4471	0.0529485	0.0205428	84.9449	0.105636	4.24669e-05		0.7	-0.6	73.3006	0.0908361	0.00572336	84.9993	0.104969	2.6786e-07			0.07	-3	12.0312	0.00184885	0.0027594	0.0028516	18.9682	0.00383121	0.00294271	0.00298448
0.8	-0.6	29.5226	0.0235876	0.0208889	84.8437	0.0906676	0.00015407		0.8	-0.6	51.5201	0.0477518	0.0138769	84.9988	0.0901971	6.96627e-07			0.08	-3	12.0166	0.00210959	0.00321369	0.00319904	18.9387	0.00436731	0.00341977	0.00332986
0.9	-0.6	13.178	0.0083413	0.0153686	84.6016	0.0779612	0.000287045		0.9	-0.6	23.1645	0.0156826	0.0142551	84.9969	0.0778613	1.26194e-06			0.09	-3	11.9999	0.00236845	0.00366798	0.00354238	18.9047	0.00489879	0.00389683	0.00367076
1	-0.6	4.54261	0.00239142	0.00764988	84.0627	0.0667812	0.000607003		1	-0.6	5.85861	0.00314608	0.00723229	84.9879	0.0673328	5.415e-06			0.1	-3	11.981	0.0026253	0.00412227	0.00388161	18.8663	0.00542527	0.00437388	0.00400718
1.1	-0.6	1.19353	0.000537124	0.00255107	82.9712	0.0567557	0.00119783		1.1	-0.6	0.65248	0.000296172	0.00156302	84.9534	0.0583852	1.88979e-05			0.11	-3	11.9598	0.00287999	0.00457656	0.00421672	18.8235	0.00594638	0.00485093	0.00433913
1.2	-0.6	0.262529	0.000102646	0.000683312	81.0593	0.0477176	0.00207064		1.2	-0.6	0	3.77589e-06	9.24788e-05	84.8476	0.0508686	5.6133e-05			0.12	-3	11.9365	0.00313238	0.00503084	0.00454773	18.7762	0.00646176	0.00532797	0.0046666
1.3	-0.6	0.0310204	1.06167e-05	7.31231e-05	78.1322	0.0395007	0.00349964		1.3	-0.6	0	4.23897e-06	2.60227e-05	84.5699	0.0444217	0.000171853			0.13	-3	11.9109	0.00338233	0.00548513	0.00487464	18.7245	0.00697105	0.00580501	0.0049896
1.4	-0.6	0.00522825	1.57511e-06	7.2076e-06	73.8391	0.0319372	0.0046387		1.4	-0.6	0.0013154	3.98071e-07	1.40547e-06	83.8259	0.0386816	0.000421867			0.14	-3	11.8831	0.00362971	0.00593942	0.00519743	18.6684	0.00747389	0.00628204	0.00530812
1.5	-0.6	0	1.39746e-08	4.16625e-08	68.3401	0.0250093	0.00659249		1.5	-0.6	2.46859e-05	6.54721e-09	1.17695e-07	82.316	0.0331275	0.00100982			0.15	-3	11.8531	0.00387439	0.00639371	0.00551612	18.6078	0.00796992	0.00675907	0.00562216
1.6	-0.6	0	4.52676e-09	1.80653e-08	61.5496	0.0190547	0.00727413		1.6	-0.6	0	2.16435e-08	6.70175e-08	79.5519	0.0278379	0.00185259			0.16	-3	11.821	0.00411621	0.00684799	0.00583069	18.5428	0.00845878	0.00723609	0.00593172
1.7	-0.6	7.39765e-07	1.5288e-10	8.82145e-10	53.9388	0.0141045	0.00798903		1.7	-0.6	2.42341e-05	5.00324e-09	1.14683e-08	74.9217	0.0225427	0.00314162			0.17	-3	11.7866	0.00435505	0.00730228	0.00614116	18.4734	0.00894013	0.00771311	0.00623681
1.8	-0.6	0	1.0053e-11	5.80633e-10	45.903	0.0102053	0.00830042		1.8	-0.6	0	1.77232e-10	1.23207e-08	68.1824	0.0174958	0.00316837			0.18	-3	11.75	0.00459078	0.00775657	0.00644752	18.3996	0.00941361	0.00819012	0.00653743
1.9	-0.6	0	9.15821e-12	1.19012e-10	38.0116	0.0072735	0.00805569		1.9	-0.6	0	3.02149e-10	1.91224e-09	58.9645	0.012831	0.00458131			0.19	-3	11.6974	0.00486197	0.00730605	0.00674978	18.3187	0.0100245	0.00736172	0.00683356
2	-0.6	1.90034e-09	2.79752e-13	2.11451e-12	30.4465	0.00501859	0.00723619		2	-0.6	1.38794e-07	2.03098e-11	6.58876e-11	48.6608	0.00891071	0.00509686			0.2	-3	11.6608	0.00507161	0.00776982	0.00704792	18.2481	0.0104445	0.00785411	0.00712522
2.1	-0.6	4.42635e-10	5.8537e-14	9.16718e-13	23.8295	0.00342481	0.00615367		2.1	-0.6	3.12251e-08	4.09773e-12	3.61763e-11	37.9791	0.00590003	0.00485334			0.21	-3	11.6219	0.00527704	0.00823359	0.00734196	18.1728	0.0108547	0.0083465	0.0074124
2.2	-0.6	0	1.43264e-14	1.45883e-13	18.1169	0.00228965	0.00488297		2.2	-0.6	0	1.77427e-12	8.33829e-12	28.0937	0.00374178	0.00403879			0.22	-3	11.5873	0.0054813	0.00767706	0.00763188	18.0721	0.0112737	0.00708381	0.00769511
2.3	-0.6	2.50677e-11	2.68956e-15	1.45881e-13	13.2573	0.00147521	0.00488287		2.3	-0.6	3.03247e-09	3.2171e-13	8.33132e-12	19.39	0.00222607	0.00403509			0.23	-3	11.5666	0.00572602	0.00683108	0.0079177	18.0316	0.0117676	0.00652592	0.00797334
2.4	-0.6	1.8281e-11	1.78902e-15	4.45218e-14	9.72432	0.00097315	0.00342669		2.4	-0.6	1.82755e-09	1.76555e-13	2.45181e-12	13.1194	0.0013391	0.00273165			0.24	-3	11.5326	0.00595519	0.00713074	0.00819942	17.9696	0.0122305	0.00682614	0.0082471
2.5	-0.6	0	4.07611e-16	5.18298e-15	6.84187	0.00061149	0.00220219		2.5	-0.6	0	6.78263e-14	4.34841e-13	8.27865	0.000747861	0.00160123			0.25	-3	11.4972	0.00617916	0.0074304	0.00847702	17.9048	0.0126814	0.00712635	0.00851637
2.6	-0.6	5.61024e-13	4.54126e-17	5.1829e-15	4.65011	0.000375129	0.00220216		2.6	-0.6	1.66957e-10	1.32906e-14	4.3457e-13	4.81957	0.000391078	0.00160021			0.26	-3	11.4604	0.00639786	0.00773006	0.00875051	17.8372	0.01312	0.00742655	0.00878117
2.7	-0.6	4.41039e-13	3.2626e-17	6.05518e-16	3.23071	0.000236071	0.00135856		2.7	-0.6	8.28768e-11	6.01743e-15	8.08973e-14	2.94782	0.000216438	0.000801597			0.27	-3	11.4221	0.00661123	0.00802971	0.0090199	17.7668	0.0135461	0.00772675	0.0090415
2.8	-0.6	2.88988e-14	1.95549e-18	2.67426e-17	2.07205	0.000137341	0.000716356		2.8	-0.6	0	2.13973e-15	1.11915e-14	1.51856	0.000101106	0.000336415			0.28	-3	11.3823	0.0068192	0.00832937	0.00928518	17.6937	0.0139596	0.00802694	0.00929735
2.9	-0.6	0	4.15167e-19	8.20701e-17	1.36971	8.28954e-05	0.000697712		2.9	-0.6	0	4.52966e-16	1.15958e-14	0.836758	5.09277e-05	0.000299095			0.29	-3	11.3411	0.00702173	0.00862903	0.00954635	17.6177	0.0143604	0.00832712	0.00954872
3	-0.6	0	2.06261e-18	2.07592e-17	0.864731	4.77865e-05	0.000325263		3	-0.6	3.23759e-12	1.80704e-16	1.47882e-15	0.411017	2.28775e-05	9.8599e-05			0.3	-3	11.2984	0.00721874	0.00892868	0.00980341	17.539	0.0147483	0.0086273	0.00979561
3.1	-0.6	0	8.17271e-19	2.0759e-17	0.540989	2.75901e-05	0.00032526		3.1	-0.6	2.07667e-14	1.07383e-18	1.47823e-15	0.197455	1.01605e-05	9.85596e-05			0.31	-3	11.2542	0.0074102	0.00922834	0.0100564	17.4574	0.0151232	0.00892747	0.010038
3.2	-0.6	9.58887e-15	4.69254e-19	1.11963e-17	0.334551	1.56299e-05	0.000121215		3.2	-0.6	0	1.74125e-17	7.27686e-17	0.0903981	4.26841e-06	1.95473e-05			0.32	-3	11.2087	0.00759604	0.009528	0.0103052	17.3731	0.0154851	0.00922763	0.010276
3.3	-0.6	0	7.66747e-21	6.91443e-18	0.210841	9.09506e-06	0.000130665		3.3	-0.6	0	1.68652e-17	1.26946e-16	0.0464153	2.02689e-06	2.18254e-05			0.33	-3	11.1616	0.00777623	0.00982765	0.0105499	17.286	0.0158337	0.00952779	0.0105094
3.4	-0.6	0	1.75786e-19	2.67872e-18	0.110932	4.43628e-06	3.92114e-05		3.4	-0.6	0	8.35061e-18	7.64141e-17	0.0126639	5.13522e-07	2.63211e-06			0.34	-3	11.1131	0.00795071	0.0101273	0.0107906	17.1961	0.0161689	0.00982794	0.0107384
3.5	-0.6	0	5.8476e-20	2.67871e-18	0.0719025	2.65844e-06	3.92112e-05		3.5	-0.6	0	1.43001e-18	7.63914e-17	0.00695472	2.61066e-07	2.63134e-06			0.35	-3	11.0631	0.00811944	0.010427	0.0110271	17.1035	0.0164907	0.0101281	0.0109629
3.6	-0.6	1.13969e-15	4.13152e-20	3.68256e-19	0.0332062	1.12876e-06	1.20489e-05		3.6	-0.6	1.26266e-13	4.40097e-18	1.36448e-17	0.00130643	4.51482e-08	3.54358e-07			0.36	-3	11.0117	0.00828238	0.0107266	0.0112595	17.008	0.016799	0.0104282	0.011183
3.7	-0.6	7.73142e-16	2.66081e-20	3.68253e-19	0.0212131	6.82532e-07	1.20488e-05		3.7	-0.6	9.65255e-14	3.18732e-18	1.36413e-17	0.000537383	1.75964e-08	3.54269e-07			0.37	-3	10.9588	0.00843948	0.0110263	0.0114878	16.9097	0.0170937	0.0107283	0.0113985
3.8	-0.6	1.31704e-16	4.20689e-21	6.75371e-19	0.0119746	3.56328e-07	8.97124e-06		3.8	-0.6	9.20909e-15	2.81356e-19	4.29991e-17	0.000195872	5.93851e-09	1.35214e-07			0.38	-3	10.9045	0.00859072	0.0113259	0.011712	16.8087	0.0173746	0.0110285	0.0116096
3.9	-0.6	0	6.49577e-21	9.24618e-20	0.0058513	1.6204e-07	2.29362e-06		3.9	-0.6	0	1.09439e-18	7.03458e-18	2.00909e-05	5.67438e-10	6.71114e-09			0.39	-3	10.8487	0.00873605	0.0116256	0.0119321	16.7048	0.0176418	0.0113286	0.0118162
4	-0.6	0	3.55817e-21	9.24613e-20	0.00356826	9.35105e-08	2.29361e-06		4	-0.6	0	6.22664e-19	7.03311e-18	5.5157e-06	1.47534e-10	6.70975e-09			0.4	-3	10.7836	0.00885071	0.0118593	0.0121481	16.6132	0.0178749	0.0117805	0.0120184
																			0.41	-3	10.7251	0.00898392	0.0121726	0.01236	16.5022	0.0181115	0.0121071	0.012216
																			0.42	-3	10.6652	0.00911063	0.0124859	0.0125677	16.3883	0.0183326	0.0124336	0.0124092
																			0.43	-3	10.6214	0.00933243	0.0126863	0.0127714	16.3003	0.0187712	0.0124261	0.0125979
																			0.44	-3	10.5591	0.0094588	0.0129172	0.0129709	16.1838	0.0189909	0.0126532	0.0127821
																			0.45	-3	10.4958	0.00957905	0.0131481	0.0131664	16.0652	0.0191964	0.0128802	0.0129619
																			0.46	-3	10.4313	0.00969315	0.0133789	0.0133577	15.9445	0.0193877	0.0131073	0.0131371
																			0.47	-3	10.3657	0.00980113	0.0136098	0.0135449	15.8217	0.0195648	0.0133343	0.0133079
																			0.48	-3	10.2989	0.00990296	0.0138407	0.013728	15.6967	0.0197277	0.0135613	0.0134742
																			0.49	-3	10.2311	0.00999867	0.0140716	0.013907	15.5697	0.0198765	0.0137883	0.0136361
																			0.5	-3	10.1621	0.0100882	0.0143024	0.0140819	15.4406	0.0200111	0.0140154	0.0137935
																			0.51	-3	10.092	0.0101717	0.0145333	0.0142527	15.3093	0.0201317	0.0142424	0.0139463
																			0.52	-3	10.0208	0.010249	0.0147642	0.0144194	15.1759	0.0202382	0.0144694	0.0140948
																			0.53	-3	9.94845	0.0103203	0.0149951	0.014582	15.0404	0.0203307	0.0146963	0.0142387
																			0.54	-3	9.87498	0.0103854	0.0152259	0.0147404	14.9029	0.0204092	0.0149233	0.0143781
																			0.55	-3	9.80039	0.0104445	0.0154568	0.0148948	14.7632	0.0204739	0.0151503	0.0145131
																			0.56	-3	9.72468	0.0104975	0.0156877	0.015045	14.6213	0.0205248	0.0153772	0.0146436
																			0.57	-3	9.64784	0.0105445	0.0159185	0.0151912	14.4774	0.0205619	0.0156042	0.0147697
																			0.58	-3	9.56345	0.0105693	0.0157118	0.0153332	14.3432	0.0205813	0.0156492	0.0148912
																			0.59	-3	9.48653	0.0106074	0.01593	0.0154711	14.1967	0.0205947	0.0158687	0.0150083
																			0.6	-3	9.40854	0.0106392	0.0161481	0.015605	14.0483	0.020594	0.0160883	0.0151209
																			0.61	-3	9.33685	0.0107551	0.0160015	0.0157347	13.9231	0.0208116	0.0158252	0.015229
																			0.62	-3	9.25876	0.0107852	0.0161175	0.0158603	13.7756	0.0208072	0.0159276	0.0153327
																			0.63	-3	9.18012	0.0108101	0.0162334	0.0159818	13.6272	0.0207916	0.01603	0.0154318
																			0.64	-3	9.10091	0.01083	0.0163493	0.0160991	13.4777	0.0207649	0.0161324	0.0155265
																			0.65	-3	9.02113	0.0108447	0.0164653	0.0162124	13.3274	0.0207272	0.0162348	0.0156168
																			0.66	-3	8.9408	0.0108545	0.0165812	0.0163216	13.176	0.0206786	0.0163371	0.0157025
																			0.67	-3	8.85989	0.0108593	0.0166971	0.0164266	13.0238	0.0206193	0.0164395	0.0157838
																			0.68	-3	8.77843	0.0108591	0.0168131	0.016542	12.8705	0.0205493	0.0165419	0.0158738
																			0.69	-3	8.6964	0.0108541	0.016929	0.0166443	12.7163	0.0204689	0.0166442	0.0159502
																			0.7	-3	8.61381	0.0108442	0.0170449	0.0167328	12.5612	0.0203782	0.0167466	0.0160122
																			0.71	-3	8.53065	0.0108296	0.0171608	0.0168196	12.4051	0.0202772	0.0168489	0.0160712
																			0.72	-3	8.44693	0.0108102	0.0172768	0.0169027	12.248	0.0201662	0.0169512	0.0161264
																			0.73	-3	8.36265	0.0107861	0.0173927	0.0169823	12.09	0.0200453	0.0170536	0.016178
																			0.74	-3	8.2778	0.0107573	0.0175086	0.0170585	11.9311	0.0199147	0.0171559	0.016226
																			0.75	-3	8.19239	0.010724	0.0176245	0.0171312	11.7712	0.0197744	0.0172582	0.0162705
																			0.76	-3	8.09441	0.0106365	0.0172335	0.0172006	11.624	0.0195952	0.0161093	0.0163118
																			0.77	-3	8.03345	0.0106363	0.016695	0.0172668	11.5149	0.0195441	0.0154904	0.0163499
																			0.78	-3	7.9241	0.0106168	0.0173104	0.0173262	11.3098	0.0194356	0.0161603	0.0163809
																			0.79	-3	7.83988	0.0105725	0.0173327	0.0173824	11.1597	0.0192884	0.0161565	0.0164086
																			0.8	-3	7.75555	0.0105254	0.017355	0.0174354	11.0095	0.0191361	0.0161528	0.0164331
																			0.81	-3	7.67112	0.0104755	0.0173773	0.0174855	10.8594	0.0189788	0.0161491	0.0164547
																			0.82	-3	7.58657	0.0104228	0.0173997	0.0175329	10.7093	0.0188166	0.0161453	0.0164737
																			0.83	-3	7.50191	0.0103674	0.017422	0.0175777	10.5593	0.0186495	0.0161416	0.0164903
																			0.84	-3	7.41715	0.0103093	0.0174443	0.0176201	10.4093	0.0184776	0.0161379	0.0165047
																			0.85	-3	7.33228	0.0102486	0.0174667	0.0176604	10.2593	0.0183011	0.0161341	0.0165171
																			0.86	-3	7.2473	0.0101852	0.017489	0.0176963	10.1093	0.01812	0.0161304	0.0165256
																			0.87	-3	7.1622	0.0101193	0.0175113	0.0177203	9.95943	0.0179345	0.0161266	0.0165178
																			0.88	-3	7.07701	0.0100509	0.0175336	0.0177425	9.80955	0.0177445	0.0161229	0.0165086
																			0.89	-3	6.9917	0.00997996	0.017556	0.0177633	9.6597	0.0175502	0.0161191	0.016498
																			0.9	-3	6.90628	0.00990657	0.0175783	0.0177707	9.50988	0.0173518	0.0161154	0.0164658
																			0.91	-3	6.82076	0.00983076	0.0176006	0.0177608	9.36009	0.0171491	0.0161117	0.016419
																			0.92	-3	6.73512	0.00975257	0.017623	0.0177461	9.21033	0.0169425	0.0161079	0.0163671
																			0.93	-3	6.7032	0.00974601	0.0173725	0.0177268	9.17377	0.0169341	0.0158178	0.0163102
																			0.94	-3	6.61878	0.00966571	0.0173517	0.0177028	9.02694	0.0167262	0.0157713	0.0162484
																			0.95	-3	6.53446	0.0095836	0.0173309	0.0176743	8.88054	0.0165155	0.0157248	0.0161819
																			0.96	-3	6.45025	0.00949971	0.0173101	0.0176414	8.73457	0.0163022	0.0156783	0.0161106
																			0.97	-3	6.36613	0.00941408	0.0172893	0.0176041	8.58903	0.0160862	0.0156318	0.0160347
																			0.98	-3	6.28211	0.00932675	0.0172685	0.0175641	8.44392	0.0158678	0.0155853	0.015955
																			0.99	-3	6.1982	0.00923774	0.0172477	0.0175196	8.29923	0.0156469	0.0155388	0.0158704
																			1	-3	6.11438	0.00914709	0.0172269	0.0174707	8.15498	0.0154237	0.0154923	0.0157812
																			1.01	-3	6.03067	0.00905485	0.0172062	0.0174176	8.01116	0.0151982	0.0154459	0.0156875
																			1.02	-3	5.94706	0.00896105	0.0171854	0.0173603	7.86776	0.0149705	0.0153994	0.0155895
																			1.03	-3	5.86355	0.00886571	0.0171646	0.0172992	7.7248	0.0147408	0.0153529	0.0154873
																			1.04	-3	5.78014	0.00876888	0.0171438	0.0172342	7.58227	0.014509	0.0153064	0.0153813
																			1.05	-3	5.69683	0.0086706	0.017123	0.0171656	7.44016	0.0142752	0.0152599	0.0152716
																			1.06	-3	5.57735	0.0084924	0.0169243	0.0170935	7.21917	0.0138309	0.0148463	0.0151584
																			1.07	-3	5.49518	0.0083917	0.0168739	0.0170181	7.08147	0.0135992	0.0147714	0.0150419
																			1.08	-3	5.41326	0.00828996	0.0168234	0.0169388	6.94447	0.0133665	0.0146965	0.0149241
																			1.09	-3	5.33158	0.00818723	0.0167729	0.0168561	6.80816	0.0131328	0.0146215	0.0148035
																			1.1	-3	5.25014	0.00808353	0.0167224	0.0167709	6.67254	0.0128982	0.0145466	0.014681
																			1.11	-3	5.15653	0.00794991	0.0174949	0.0166823	6.50808	0.0125869	0.0154241	0.0145529
																			1.12	-3	5.07169	0.00783657	0.0173978	0.0165906	6.36525	0.0123303	0.0152958	0.0144219
																			1.13	-3	4.98733	0.00772279	0.0173006	0.0164959	6.2236	0.0120742	0.0151675	0.0142882
																			1.14	-3	4.90345	0.00760861	0.0172035	0.0163985	6.08314	0.0118187	0.0150392	0.014152
																			1.15	-3	4.82003	0.00749407	0.0171064	0.0162983	5.94388	0.0115639	0.0149109	0.0140135
																			1.16	-3	4.73709	0.00737919	0.0170093	0.0161957	5.8058	0.0113099	0.0147826	0.0138728
																			1.17	-3	4.65461	0.00726402	0.0169121	0.0160907	5.66892	0.0110568	0.0146543	0.0137301
																			1.18	-3	4.57262	0.00714857	0.016815	0.0159835	5.53323	0.0108045	0.014526	0.0135857
																			1.19	-3	4.49109	0.0070329	0.0167179	0.0158742	5.39872	0.0105532	0.0143977	0.0134397
																			1.2	-3	4.41003	0.00691702	0.0166208	0.015763	5.26541	0.0103029	0.0142695	0.0132923
																			1.21	-3	4.32945	0.00680097	0.0165236	0.0156483	5.13329	0.0100537	0.0141412	0.0131389
																			1.22	-3	4.24934	0.00668479	0.0164265	0.0155315	5.00235	0.00980567	0.0140129	0.012984
																			1.23	-3	4.1697	0.0065685	0.0163294	0.015413	4.87261	0.00955885	0.0138847	0.0128281
																			1.24	-3	4.08003	0.00643248	0.0154833	0.0152929	4.73018	0.00927545	0.0128172	0.0126714
																			1.25	-3	4.00514	0.00632358	0.0153211	0.0151714	4.61183	0.00905285	0.0126302	0.0125141
																			1.26	-3	3.93103	0.00621535	0.0151589	0.0150438	4.49522	0.00883297	0.0124431	0.0123545
																			1.27	-3	3.85771	0.00610781	0.0149967	0.0149147	4.38034	0.00861585	0.0122561	0.0121946
																			1.28	-3	3.78519	0.00600097	0.0148345	0.0147845	4.2672	0.00840151	0.0120691	0.0120348
																			1.29	-3	3.71345	0.00589487	0.0146723	0.0146491	4.1558	0.00818997	0.0118821	0.0118698
																			1.3	-3	3.63086	0.00576317	0.0145519	0.0145115	4.01548	0.0079064	0.0118045	0.0117036
																			1.31	-3	3.56059	0.00565821	0.014351	0.0143719	3.90675	0.00769878	0.0115724	0.0115365
																			1.32	-3	3.49129	0.00555436	0.01415	0.0142304	3.80017	0.00749494	0.0113404	0.0113687
																			1.33	-3	3.42297	0.00545164	0.0139491	0.0140872	3.69575	0.0072949	0.0111084	0.0112003
																			1.34	-3	3.35563	0.00535007	0.0137482	0.0139424	3.59349	0.00709869	0.0108764	0.0110317
																			1.35	-3	3.28927	0.00524966	0.0135472	0.0137962	3.49338	0.00690632	0.0106445	0.0108628
																			1.36	-3	3.22388	0.00515043	0.0133463	0.0136505	3.39543	0.00671781	0.0104125	0.0106957
																			1.37	-3	3.15947	0.00505239	0.0131454	0.0135038	3.29963	0.00653318	0.0101805	0.0105289
																			1.38	-3	3.09604	0.00495555	0.0129445	0.0133562	3.20599	0.00635245	0.00994858	0.0103626
																			1.39	-3	3.03358	0.00485994	0.0127435	0.0132079	3.11451	0.00617564	0.00971663	0.010197
																			1.4	-3	2.9721	0.00476557	0.0125426	0.013059	3.02518	0.00600275	0.00948469	0.0100323
																			1.41	-3	2.9116	0.00467244	0.0123417	0.0129098	2.93801	0.00583382	0.00925276	0.00986872
																			1.42	-3	2.85207	0.00458057	0.0121407	0.0127603	2.853	0.00566884	0.00902084	0.00970648
																			1.43	-3	2.79352	0.00448998	0.0119398	0.0126108	2.77014	0.00550785	0.00878893	0.00954579
																			1.44	-3	2.75624	0.00443039	0.0120889	0.0124516	2.7388	0.00544086	0.00894501	0.00936654
																			1.45	-3	2.69781	0.004339	0.0119429	0.0122843	2.6563	0.00527931	0.00878816	0.00917966
																			1.46	-3	2.64008	0.00424851	0.0117969	0.0121224	2.57525	0.00512041	0.00863131	0.00899995
																			1.47	-3	2.58307	0.00415895	0.0116509	0.0119593	2.49566	0.00496417	0.00847446	0.00882019
																			1.48	-3	2.52677	0.00407033	0.0115049	0.0117952	2.41753	0.00481062	0.00831763	0.0086405
																			1.49	-3	2.47118	0.00398264	0.0113589	0.0116303	2.34086	0.00465974	0.0081608	0.00846104
																			1.5	-3	2.4163	0.00389591	0.0112129	0.0114647	2.26565	0.00451158	0.00800397	0.00828195
																			1.51	-3	2.36213	0.00381014	0.0110669	0.0112984	2.19189	0.00436612	0.00784715	0.00810338
																			1.52	-3	2.29714	0.00370228	0.0111552	0.0111317	2.09076	0.00415955	0.00791664	0.00792548
																			1.53	-3	2.24331	0.0036167	0.0109827	0.0109648	2.01796	0.00401569	0.0077286	0.0077484
																			1.54	-3	2.19032	0.00353233	0.0108102	0.0107976	1.9469	0.00387519	0.00754057	0.00757228
																			1.55	-3	2.13818	0.00344918	0.0106377	0.0106304	1.8776	0.00373804	0.00735254	0.00739728
																			1.56	-3	2.08686	0.00336726	0.0104652	0.0104633	1.81004	0.00360428	0.00716453	0.00722352
																			1.57	-3	2.03639	0.00328657	0.0102928	0.0102965	1.74424	0.00347389	0.00697651	0.00705118
																			1.58	-3	1.98676	0.00320712	0.0101203	0.01013	1.68018	0.00334688	0.00678851	0.00688041
																			1.59	-3	1.93797	0.00312892	0.0099478	0.00996414	1.61787	0.00322327	0.00660051	0.00671134
																			1.6	-3	1.89001	0.00305197	0.00977532	0.00979893	1.55731	0.00310306	0.00641252	0.00654415
																			1.61	-3	1.84289	0.00297628	0.00960284	0.00963134	1.49849	0.00298626	0.00622454	0.00637559
																			1.62	-3	1.79661	0.00290186	0.00943037	0.00946566	1.44143	0.00287288	0.00603656	0.00621004
																			1.63	-3	1.75117	0.00282871	0.00925789	0.00930032	1.38611	0.00276291	0.00584859	0.00604474
																			1.64	-3	1.72537	0.0027885	0.00894	0.00912898	1.37797	0.00274758	0.00561008	0.00587609
																			1.65	-3	1.68226	0.00271947	0.00879155	0.00895812	1.3264	0.00264552	0.00546907	0.00570917
																			1.66	-3	1.63986	0.00265154	0.0086431	0.00878789	1.27615	0.00254599	0.00532808	0.00554413
																			1.67	-3	1.59819	0.0025847	0.00849465	0.00861843	1.2272	0.002449	0.00518709	0.00538108
																			1.68	-3	1.55725	0.00251897	0.00834621	0.00844989	1.17957	0.00235455	0.0050461	0.00522019
																			1.69	-3	1.51702	0.00245435	0.00819776	0.00828239	1.13325	0.00226265	0.00490512	0.00506158
																			1.7	-3	1.47751	0.00239083	0.00804932	0.0081161	1.08824	0.0021733	0.00476415	0.00490538
																			1.71	-3	1.43873	0.00232843	0.00790087	0.00795115	1.04455	0.00208651	0.00462318	0.00475175
																			1.72	-3	1.40067	0.00226714	0.00775243	0.00778768	1.00216	0.00200228	0.00448221	0.00460081
																			1.73	-3	1.36333	0.00220697	0.00760399	0.00762584	0.961089	0.00192061	0.00434125	0.00445268
																			1.74	-3	1.32671	0.00214793	0.00745554	0.00746367	0.921327	0.00184151	0.0042003	0.00430319
																			1.75	-3	1.28385	0.00207712	0.0073666	0.00730293	0.865323	0.00172833	0.00410356	0.00415615
																			1.76	-3	1.24843	0.00201992	0.00719938	0.00714371	0.827852	0.00165374	0.00394563	0.00401166
																			1.77	-3	1.21383	0.00196402	0.00703216	0.00698615	0.79185	0.00158205	0.0037877	0.00386983
																			1.78	-3	1.18003	0.0019094	0.00686494	0.00683035	0.757318	0.00151327	0.00362978	0.00373076
																			1.79	-3	1.14706	0.00185609	0.00669773	0.00668613	0.724255	0.0014474	0.00347186	0.00360577
																			1.8	-3	1.11489	0.00180406	0.00653051	0.00654406	0.692663	0.00138445	0.00331396	0.00348392
																			1.81	-3	1.08354	0.00175334	0.00636329	0.00640423	0.66254	0.00132441	0.00315605	0.0033653
																			1.82	-3	1.053	0.00170391	0.00619608	0.00626672	0.633887	0.00126729	0.00299816	0.00324996
																			1.83	-3	1.02327	0.00165579	0.00602886	0.00613162	0.606703	0.00121309	0.00284026	0.00313796
																			1.84	-3	0.994362	0.00160897	0.00586165	0.00600163	0.58099	0.00116181	0.00268238	0.00303095
																			1.85	-3	0.966263	0.00156345	0.00569444	0.00587415	0.556746	0.00111346	0.0025245	0.00292735
																			1.86	-3	0.938976	0.00151923	0.00552722	0.00574927	0.533972	0.00106803	0.00236663	0.002827
																			1.87	-3	0.934175	0.00150926	0.00553434	0.00562705	0.564097	0.00112602	0.00267444	0.00272975
																			1.88	-3	0.907528	0.00146635	0.00542442	0.00550758	0.539569	0.00107724	0.00259329	0.00263568
																			1.89	-3	0.881416	0.00142427	0.00531449	0.00539092	0.515795	0.00102994	0.00251214	0.00254488
																			1.9	-3	0.855838	0.00138303	0.00520457	0.00527715	0.492777	0.000984128	0.00243099	0.00245745
																			1.91	-3	0.830794	0.00134264	0.00509464	0.00516634	0.470514	0.000939797	0.00234985	0.00237346
																			1.92	-3	0.806285	0.00130309	0.00498472	0.00504974	0.449007	0.000896953	0.00226871	0.00228192
																			1.93	-3	0.782311	0.00126439	0.0048748	0.00493073	0.428255	0.000855598	0.00218757	0.00219314
																			1.94	-3	0.758871	0.00122654	0.00476488	0.00481339	0.408258	0.000815735	0.00210644	0.00210672
																			1.95	-3	0.735966	0.00118954	0.00465495	0.00469777	0.389016	0.000777364	0.0020253	0.00202265
																			1.96	-3	0.713595	0.00115338	0.00454503	0.0045839	0.37053	0.000740487	0.00194418	0.00194093
																			1.97	-3	0.691759	0.00111808	0.00443511	0.00447179	0.352799	0.000705107	0.00186305	0.00186154
																			1.98	-3	0.670457	0.00108363	0.00432519	0.00436196	0.335823	0.000671223	0.00178193	0.00178576
																			1.99	-3	0.64969	0.00105004	0.00421527	0.00425351	0.319603	0.000638839	0.00170081	0.00171185
																			2	-3	0.629457	0.0010173	0.00410535	0.00414643	0.304138	0.000607954	0.00161969	0.00163975
																			2.01	-3	0.609759	0.000985412	0.00399543	0.00404071	0.289428	0.00057857	0.00153858	0.00156941
																			2.02	-3	0.588715	0.000950854	0.00371789	0.00393632	0.269938	0.000539378	0.0013069	0.00150075
																			2.03	-3	0.570942	0.000922121	0.00359126	0.00383324	0.258209	0.000515976	0.00121136	0.00143373
																			2.04	-3	0.553785	0.000894379	0.00346462	0.00373145	0.247369	0.000494347	0.00111582	0.00136827
																			2.05	-3	0.537243	0.00086763	0.00333798	0.00363092	0.237419	0.000474491	0.00102029	0.00130431
																			2.06	-3	0.521317	0.000841872	0.00321134	0.00353163	0.228359	0.000456409	0.00092476	0.00124177
																			2.07	-3	0.506007	0.000817108	0.00308471	0.00343354	0.220189	0.000440102	0.000829234	0.00118058
																			2.08	-3	0.491313	0.000793336	0.00295807	0.00333663	0.212909	0.00042557	0.000733711	0.00112065
																			2.09	-3	0.477235	0.000770557	0.00283144	0.00324085	0.206518	0.000412814	0.000638191	0.00106192
																			2.1	-3	0.453861	0.00073068	0.00306727	0.00314617	0.178521	0.000355638	0.00106597	0.0010043
																			2.11	-3	0.439145	0.00070682	0.00298468	0.00305256	0.168826	0.000336254	0.00101509	0.00094769
																			2.12	-3	0.42483	0.000683612	0.00290209	0.00296409	0.159605	0.000317818	0.000964222	0.000896589
																			2.13	-3	0.410917	0.000661057	0.0028195	0.00287754	0.150858	0.00030033	0.000913353	0.000847542
																			2.14	-3	0.397405	0.000639154	0.00273691	0.00279292	0.142585	0.00028379	0.000862485	0.000800485
																			2.15	-3	0.384295	0.000617904	0.00265433	0.00271022	0.134786	0.000268197	0.000811619	0.000755328
																			2.16	-3	0.371587	0.000597306	0.00257174	0.00262946	0.12746	0.000253553	0.000760755	0.000712049
																			2.17	-3	0.35928	0.00057736	0.00248915	0.00255063	0.120609	0.000239856	0.000709893	0.000670624
																			2.18	-3	0.347375	0.000558066	0.00240657	0.00247324	0.114231	0.000227107	0.000659033	0.00063117
																			2.19	-3	0.335872	0.000539425	0.00232398	0.00239776	0.108327	0.000215303	0.000608175	0.000593526
																			2.2	-3	0.32477	0.000521435	0.0022414	0.00232692	0.102896	0.000204447	0.000557319	0.000560326
																			2.21	-3	0.31407	0.000504097	0.00215881	0.00225789	0.0979398	0.000194535	0.000506465	0.000528696
																			2.22	-3	0.303772	0.000487411	0.00207623	0.00219062	0.093457	0.000185569	0.000455613	0.000498577
																			2.23	-3	0.293875	0.000471376	0.00199364	0.00212508	0.0894481	0.000177548	0.000404762	0.000469908
																			2.24	-3	0.28438	0.000455992	0.00191106	0.00206127	0.085913	0.00017047	0.000353914	0.000442625
																			2.25	-3	0.275286	0.000441258	0.00182847	0.00199914	0.0828516	0.000164335	0.000303068	0.000416662
																			2.26	-3	0.266594	0.000427175	0.00174589	0.00193866	0.0802641	0.000159143	0.000252223	0.000391952
																			2.27	-3	0.258304	0.000413742	0.00166331	0.00187981	0.0781504	0.000154891	0.000201381	0.000368422
																			2.28	-3	0.257862	0.000413052	0.00142351	0.00182111	0.0887406	0.000175889	1.0919e-06	0.000346327
																			2.29	-3	0.251165	0.000402209	0.00133049	0.001764	0.089021	0.000176388	5.90627e-05	0.000325278
																			2.3	-3	0.231193	0.000369578	0.00184423	0.00170842	0.0626517	0.000123884	0.000477078	0.000305194
																			2.31	-3	0.222322	0.000355211	0.00180387	0.00165436	0.0582742	0.00011516	0.000462252	0.000285993
																			2.32	-3	0.213647	0.00034117	0.00176351	0.00160006	0.0540348	0.000106717	0.000447426	0.000266994
																			2.33	-3	0.205168	0.000327452	0.00172314	0.00154736	0.0499335	9.85559e-05	0.000432602	0.000249215
																			2.34	-3	0.196885	0.00031406	0.00168278	0.00149622	0.0459703	9.06756e-05	0.000417778	0.000232607
																			2.35	-3	0.188799	0.000300991	0.00164242	0.0014393	0.0421452	8.30764e-05	0.000402954	0.000203481
																			2.36	-3	0.180909	0.000288247	0.00160205	0.00138365	0.0384582	7.57579e-05	0.000388131	0.000175379
																			2.37	-3	0.173216	0.000275827	0.00156169	0.00132927	0.0349093	6.87201e-05	0.000373309	0.000148302
																			2.38	-3	0.165718	0.000263731	0.00152133	0.00127617	0.0314986	6.19625e-05	0.000358487	0.00012225
																			2.39	-3	0.158417	0.000251959	0.00148097	0.00122433	0.0282259	5.5485e-05	0.000343665	9.72224e-05
																			2.4	-3	0.151313	0.00024051	0.0014406	0.00117376	0.0250913	4.92872e-05	0.000328845	7.32195e-05
																			2.41	-3	0.144404	0.000229385	0.00140024	0.00112447	0.0220948	4.33689e-05	0.000314024	5.02413e-05
																			2.42	-3	0.137692	0.000218583	0.00135988	0.00107644	0.0192364	3.77296e-05	0.000299205	2.82877e-05
																			2.43	-3	0.131176	0.000208103	0.00131952	0.00102969	0.0165161	3.23691e-05	0.000284386	7.35895e-06
																			2.44	-3	0.124857	0.000197947	0.00127916	0.00098421	0.013934	2.72868e-05	0.000269567	7.35895e-06
																			2.45	-3	0.118733	0.000188112	0.0012388	0.000939999	0.0114899	2.24825e-05	0.000254749	7.35895e-06
																			2.46	-3	0.112807	0.0001786	0.00119843	0.000897058	0.00918391	1.79556e-05	0.000239932	7.35895e-06
																			2.47	-3	0.107076	0.000169409	0.00115807	0.000855389	0.00701603	1.37057e-05	0.000225115	7.35895e-06
																			2.48	-3	0.101542	0.000160539	0.00111771	0.000814991	0.00498625	9.73224e-06	0.000210299	7.35895e-06
																			2.49	-3	0.0962034	0.00015199	0.00107735	0.000775864	0.00309457	6.03479e-06	0.000195483	7.35895e-06
																			2.5	-3	0.0997066	0.000157526	0.000790425	0.000738008	0.0104533	2.03803e-05	3.18079e-05	7.35895e-06
																			2.51	-3	0.0959926	0.000151559	0.000736805	0.000701422	0.0102567	1.99806e-05	1.03556e-05	7.35895e-06
																			2.52	-3	0.0925394	0.00014601	0.000683185	0.000666108	0.0102601	1.99706e-05	1.1096e-05	7.35895e-06
																			2.53	-3	0.089347	0.000140879	0.000629565	0.000632065	0.0104636	2.03494e-05	3.25467e-05	7.35895e-06
																			2.54	-3	0.0864153	0.000136165	0.000575945	0.000599292	0.0108671	2.1116e-05	5.39967e-05	7.35895e-06
																			2.55	-3	0.0837445	0.000131866	0.000522326	0.000567791	0.0114706	2.22693e-05	7.54458e-05	7.35895e-06
																			2.56	-3	0.0813344	0.000127984	0.000468707	0.000537561	0.0122741	2.38084e-05	9.68942e-05	7.35895e-06
																			2.57	-3	0.0791851	0.000124515	0.000415088	0.000508601	0.0132777	2.5732e-05	0.000118342	7.35895e-06
																			2.58	-3	0.0772966	0.000121461	0.000361469	0.000480913	0.0144812	2.80393e-05	0.000139788	7.35895e-06
																			2.59	-3	0.0661982	0.000103728	0.000696448	0.000454495	0.00558531	1.07872e-05	0.000100929	7.35895e-06
																			2.6	-3	0.0628638	9.84141e-05	0.000674644	0.000429348	0.00466691	9.00354e-06	9.60343e-05	7.35895e-06
																			2.61	-3	0.0596355	9.32743e-05	0.00065284	0.000405473	0.00379415	7.31165e-06	9.11403e-05	7.35895e-06
																			2.62	-3	0.0565132	8.83085e-05	0.000631037	0.000382868	0.002967	5.71125e-06	8.62464e-05	7.35895e-06
																			2.63	-3	0.053497	8.35165e-05	0.000609233	0.000361535	0.00218548	4.20211e-06	8.13527e-05	7.35895e-06
																			2.64	-3	0.0505868	7.88979e-05	0.00058743	0.000341472	0.00144959	2.78397e-06	7.64592e-05	7.35895e-06
																			2.65	-3	0.0477827	7.44524e-05	0.000565626	0.00032268	0.000759315	1.45659e-06	7.15659e-05	7.35895e-06
																			2.66	-3	0.0450846	7.01797e-05	0.000543823	0.000305159	0.000114669	2.1971e-07	6.66727e-05	7.35895e-06
																			2.67	-3	0.0424925	6.60795e-05	0.00052202	0.000288909	0	9.26939e-07	6.17797e-05	7.35895e-06
																			2.68	-3	0.0400065	6.21513e-05	0.000500217	0.000273931	0	1.98363e-06	5.68869e-05	7.35895e-06
																			2.69	-3	0.0376265	5.83947e-05	0.000478413	0.000260223	0	2.95063e-06	5.19943e-05	7.35895e-06
																			2.7	-3	0.0353526	5.48095e-05	0.00045661	0.000247786	0	3.82823e-06	4.71019e-05	7.35895e-06
																			2.71	-3	0.0331847	5.13953e-05	0.000434808	0.00023662	0	4.61671e-06	4.22097e-05	7.35895e-06
																			2.72	-3	0.0311229	4.81515e-05	0.000413005	0.000226725	0	5.31638e-06	3.73176e-05	7.35895e-06
																			2.73	-3	0.0291671	4.50778e-05	0.000391202	0.000218101	0	5.92753e-06	3.24257e-05	7.35895e-06
																			2.74	-3	0.0273173	4.21738e-05	0.000369399	0.000210748	0	6.45048e-06	2.7534e-05	7.35895e-06
																			2.75	-3	0.0255736	3.9439e-05	0.000347597	0.000204666	0	6.88553e-06	2.26425e-05	7.35895e-06
																			2.76	-3	0.023936	3.68731e-05	0.000325794	0.000199855	0	7.23301e-06	1.77511e-05	7.35895e-06
																			2.77	-3	0.0224043	3.44754e-05	0.000303992	0.000196315	0	7.49325e-06	1.286e-05	7.35895e-06
																			2.78	-3	0.0209788	3.22457e-05	0.000282189	0.000194045	0	7.66657e-06	7.96897e-06	7.35895e-06
																			2.79	-3	0.0196592	3.01833e-05	0.000260387	0.000193047	0	7.75332e-06	3.07816e-06	7.35895e-06
																			2.8	-3	0.0184457	2.82878e-05	0.000238585	0.000192	0	7.75385e-06	1.81247e-06	7.35895e-06
																			2.81	-3	0.0173383	2.65588e-05	0.000216783	0.000185	0	7.66849e-06	6.70293e-06	7.35895e-06
																			2.82	-3	0.0163369	2.49956e-05	0.000194981	0.000178	0	7.49763e-06	1.15932e-05	7.35895e-06
																			2.83	-3	0.0154415	2.35979e-05	0.000173179	0.000171	0	7.2416e-06	1.64833e-05	7.35895e-06
																			2.84	-3	0.0192772	2.94209e-05	0.000197823	0.000164	0	2.22066e-06	8.00989e-06	7.35895e-06
																			2.85	-3	0.018353	2.79761e-05	0.000182194	0.000157	0	2.05109e-06	1.10751e-05	7.35895e-06
																			2.86	-3	0.0175048	2.66502e-05	0.000166565	0.00015	0	1.82862e-06	1.41403e-05	7.35895e-06
																			2.87	-3	0.0167326	2.54428e-05	0.000150936	0.000143	0	1.55347e-06	1.72053e-05	7.35895e-06
																			2.88	-3	0.0160365	2.43535e-05	0.000135307	0.000136	0	1.22591e-06	2.02702e-05	7.35895e-06
																			2.89	-3	0.0154163	2.33819e-05	0.000119678	0.000129	0	8.46179e-07	2.3335e-05	7.35895e-06
																			2.9	-3	0.0148722	2.25276e-05	0.000104049	0.000122	0	4.14527e-07	2.63997e-05	7.35895e-06
																			2.91	-3	0.0144042	2.17901e-05	8.84196e-05	0.000115	3.71416e-05	6.87856e-08	2.94642e-05	7.35895e-06
																			2.92	-3	0.0140121	2.11691e-05	7.27907e-05	0.000108	0.000326369	6.03499e-07	3.25287e-05	7.35895e-06
																			2.93	-3	0.013696	2.06641e-05	5.71619e-05	0.000101	0.000644197	1.18935e-06	3.55931e-05	7.35895e-06
																			2.94	-3	0.00970828	1.46088e-05	0.000177151	9.4e-05	0	4.53453e-07	7.96896e-06	7.35895e-06
																			2.95	-3	0.00886551	1.33217e-05	0.000169378	8.7e-05	0	5.85038e-07	7.45518e-06	7.35895e-06
																			2.96	-3	0.00806054	1.20949e-05	0.000161604	8e-05	0	7.07388e-07	6.94143e-06	7.35895e-06
																			2.97	-3	0.00729338	1.0928e-05	0.000153831	7.3e-05	0	8.20543e-07	6.42769e-06	7.35895e-06
																			2.98	-3	0.00656404	9.82097e-06	0.000146057	6.6e-05	0	9.24546e-07	5.91396e-06	7.35895e-06
																			2.99	-3	0.0058725	8.77351e-06	0.000138284	5.9e-05	0	1.01944e-06	5.40026e-06	7.35895e-06
																			3	-3	0.00521878	7.7854e-06	0.00013051	5.2e-05	0	1.10526e-06	4.88658e-06	7.35895e-06
