# Supplementary material for: Study of methane migration in the shallow subsurface from a gas pipe leak
Source: Oxford University Press journal article supplement (doi:10.1525/elementa.2021.00008), 2021-01-01

**Supplemental data for Study of Methane Migration in Shallow Subsurface from a Gas Pipe Leak**

**Authors: Bo Gao, Melissa Mitton, Clay Bell, Dan Zimmerle, Chamindu Deepagoda T.K.K., Arsineh Hecobian, Kathleen M. Smits**

The accompanying excel data file includes the methane concentrations in percent (%) collected at three times during the three experimental cases. The three cases are presented in the table below. The time (T) is defined as the time elapsed since methane began flowing, in hours.

| Case # | Textural configuration | Leak rate | Average wind speed | Average saturation |
| --- | --- | --- | --- | --- |
|  |  | kg/hr | m/s |  |
| 1 | Homogeneous | 0.50 | 1.2 | 0.14 |
| 2 | Homogeneous | 0.85 | 1.3 | 0.14 |
| 3 | Layered soil | 0.85 | 1.6 | sand 0.15, clay 0.38 |

Each point where a methane concentration was collected is described by an x,y,z coordinate. The axis for the coordinate system is positioned at the ground surface above the corresponding emission point as pictured below. The x,y,z coordinates are in meters (m).


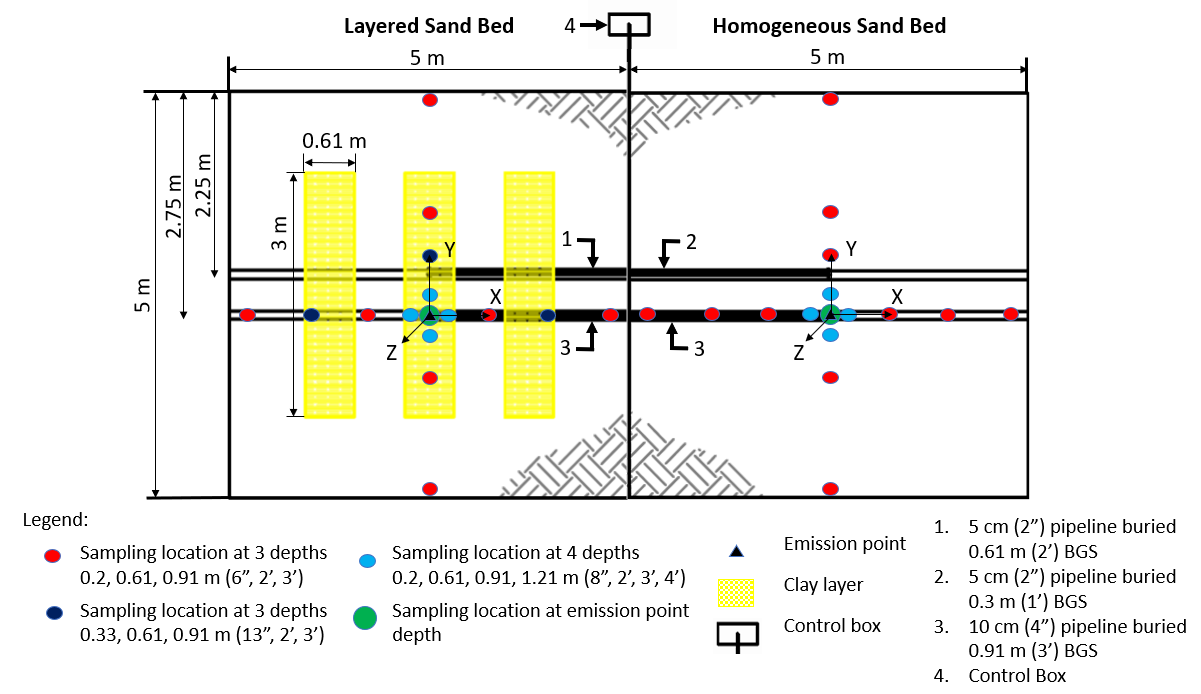

Supplement: supplemental_data_for_gao_et_al.docx [file supplemental_data_for_gao_et_al.docx]
